# Supplementary material for: Complete genome sequence and metabolic potential of the quinaldine-degrading bacterium Arthrobacter sp. Rue61a
Source: PubMed Central journal article supplement (PMC3534580; doi:10.1186/1471-2164-13-534), 2012-10-06
Supplement: 1471-2164-13-534-S1.pdf [file 1471-2164-13-534-S1.pdf]

## Additional File 1:

### Genes of *Arthrobacter* sp. Rue61a associated with putative genomic islands

**Table S1:** Genes of *Arthrobacter* sp. Rue61a associated with putative genomic islands, generated by IslandViewer web-tool.

| Locus_tag   | Annotation                                                                           |
|-------------|--------------------------------------------------------------------------------------|
| ARUE_c17500 | hypothetical protein                                                                 |
| ARUE_c17510 | hypothetical protein                                                                 |
| ARUE_c17520 | nephrocystin                                                                         |
| ARUE_c17530 | hypothetical protein                                                                 |
| ARUE_c17540 | hypothetical protein                                                                 |
| ARUE_c17550 | hypothetical protein                                                                 |
| ARUE_c17560 | hypothetical protein                                                                 |
| ARUE_c17570 | hypothetical protein                                                                 |
| ARUE_c17580 | hypothetical protein                                                                 |
| ARUE_c17590 | hypothetical protein                                                                 |
| ARUE_c17600 | hypothetical protein                                                                 |
| ARUE_c17610 | hypothetical protein                                                                 |
| ARUE_c17620 | hypothetical protein                                                                 |
| ARUE_c17630 | hypothetical protein                                                                 |
| ARUE_c17640 | hypothetical protein                                                                 |
| ARUE_c17650 | possible sugar phosphate isomerase/ epimerase                                        |
| ARUE_c18300 | ferredoxin-2                                                                         |
| ARUE_c18310 | putative cytochrome P450 (CYP) oxygenase                                             |
| ARUE_c18320 | putative ferredoxin reductase / NAD(FAD)-dependent dehydrogenase                     |
| ARUE_c18330 | EmrB/QacA subfamily drug resistance transporter                                      |
| ARUE_c18340 | regulatory protein, TetR                                                             |
| ARUE_c18350 | 2-(S)-hydroxypropyl-CoM dehydrogenase XecE                                           |
| ARUE_c18360 | medium-chain dehydrogenase/reductase (MDR) family protein                            |
| ARUE_c18370 | fumarylacetoacetate (FAA) superfamily protein                                        |
| ARUE_c18410 | D-lactate dehydrogenase                                                              |
| ARUE_c18420 | dihydroxy-acid dehydratase IlvD                                                      |
| ARUE_c18430 | hypothetical protein                                                                 |
| ARUE_c18440 | extracellular beta-glucosidase BglX                                                  |
| ARUE_c18450 | putative rhamnosidase                                                                |
| ARUE_c18460 | hypothetical protein                                                                 |
| ARUE_c18470 | glucose-resistance amylase regulator                                                 |
| ARUE_c18480 | putative sugar ABC transporter, permease protein                                     |
| ARUE_c18490 | putative sugar ABC transporter, permease protein                                     |
| ARUE_c18500 | putative secreted sugar-binding protein                                              |
| ARUE_c18510 | ABC transporter                                                                      |
| ARUE_c18520 | alpha-L-rhamnosidase                                                                 |
| ARUE_c18550 | hypothetical protein                                                                 |
| ARUE_c18560 | putative NAD(P)-dependent oxidoreductase, short chain dehydrogenase/reductase family |
| ARUE_c18570 | putative glucitol transport protein GutA                                             |
| ARUE_c18580 | transcriptional regulatory protein                                                   |
| ARUE_c18590 | hypothetical protein                                                                 |

|             |                                                                             |
|-------------|-----------------------------------------------------------------------------|
| ARUE_c18600 | 6-phosphogluconate dehydrogenase NAD-binding                                |
| ARUE_c18610 | hypothetical protein                                                        |
| ARUE_c18620 | triosephosphate isomerase                                                   |
| ARUE_c18630 | putative sugar phosphate isomerase                                          |
| ARUE_c18640 | putative dihydroxyacetone kinase                                            |
| ARUE_c18650 | putative tartrate transporter TtuB                                          |
| ARUE_c18660 | GntR domain protein                                                         |
| ARUE_c18670 | transcriptional regulator, TetR family                                      |
| ARUE_c18680 | major facilitator superfamily MFS_1                                         |
| ARUE_c18690 | 3-alpha-(or 20-beta)-hydroxysteroid dehydrogenase FabG                      |
| ARUE_c18700 | thermostable beta-glucosidase B                                             |
| ARUE_c18710 | putative inosine-uridine preferring nucleoside hydrolase                    |
| ARUE_c18720 | extracellular beta-glucosidase BglX                                         |
| ARUE_c18730 | hypothetical protein                                                        |
| ARUE_c18740 | hypothetical protein                                                        |
| ARUE_c18750 | hypothetical protein                                                        |
| ARUE_c18760 | putative oxidoreductase                                                     |
| ARUE_c18770 | transcriptional regulator, TetR family                                      |
| ARUE_c18780 | 3-hydroxybutyryl-CoA dehydratase Crt                                        |
| ARUE_c18790 | hypothetical protein                                                        |
| ARUE_c18800 | putative transcriptional regulator                                          |
| ARUE_c18810 | uncharacterized protein YraM                                                |
| ARUE_c18820 | aldehyde dehydrogenase                                                      |
| ARUE_c18830 | formyl-coenzyme A transferase Frc                                           |
| ARUE_c18840 | hypothetical protein                                                        |
| ARUE_c18850 | hypothetical protein                                                        |
| ARUE_c18860 | hypothetical protein                                                        |
| ARUE_c18870 | putative cytochrome P450                                                    |
| ARUE_c18880 | hypothetical protein                                                        |
| ARUE_c18890 | hypothetical protein                                                        |
| ARUE_c18900 | uncharacterized NAD(FAD) dependent dehydrogenase, ferredoxin reductase-like |
| ARUE_c18910 | hypothetical protein                                                        |
| ARUE_c18920 | hypothetical protein                                                        |
| ARUE_c18930 | hypothetical protein                                                        |
| ARUE_c18940 | hypothetical protein                                                        |
| ARUE_c18950 | hypothetical protein                                                        |
| ARUE_c18960 | hypothetical protein                                                        |
| ARUE_c18970 | putative nucleic-acid-binding protein containing a Zn-ribbon                |
| ARUE_c18980 | putative 3-oxoacyl-[acyl-carrier-protein] reductase                         |
| ARUE_c18990 | hypothetical protein                                                        |
| ARUE_c19000 | hypothetical protein                                                        |
| ARUE_c19010 | hypothetical protein                                                        |
| ARUE_c19020 | putative enoyl-CoA hydratase/isomerase                                      |
| ARUE_c19030 | hypothetical protein                                                        |
| ARUE_c19040 | hypothetical protein                                                        |
| ARUE_c19080 | proline/betaine transporter ProP                                            |
| ARUE_c19090 | putative PucR-like transcriptional regulator                                |
| ARUE_c19100 | hypothetical protein                                                        |
| ARUE_c19110 | hypothetical protein                                                        |
| ARUE_c19120 | hypothetical protein                                                        |
| ARUE_c19130 | integral membrane protein                                                   |
| ARUE_c19140 | putative integral membrane protein                                          |
| ARUE_c19150 | aminobenzoyl-glutamate utilization proteinB                                 |

|             |                                                                         |
|-------------|-------------------------------------------------------------------------|
| ARUE_c19160 | hypothetical protein                                                    |
| ARUE_c19240 | transcriptional regulator, IclR family                                  |
| ARUE_c19250 | putative ABC transporter permease protein YesQ                          |
| ARUE_c19260 | sn-glycerol-3-phosphate transport system permease protein UgpA          |
| ARUE_c19270 | 3',5'-cyclic-nucleotide phosphodiesterase                               |
| ARUE_c19280 | hypothetical protein                                                    |
| ARUE_c19290 | putative ABC transporter substrate-binding protein                      |
| ARUE_c19300 | sn-glycerol-3-phosphate import ATP-binding protein UgpC                 |
| ARUE_c19310 | putative RpiR family transcriptional regulator                          |
| ARUE_c19320 | hypothetical protein, hotdog fold superfamily                           |
| ARUE_c19330 | hypothetical protein                                                    |
| ARUE_c19340 | hypothetical protein                                                    |
| ARUE_c19350 | hypothetical protein                                                    |
| ARUE_c19360 | hypothetical protein                                                    |
| ARUE_c21000 | HTH-type transcriptional regulator CynR                                 |
| ARUE_c21020 | HTH-type transcriptional regulator GbpR                                 |
| ARUE_c21030 | putative acid-CoA ligase                                                |
| ARUE_c21040 | hypothetical protein                                                    |
| ARUE_c21050 | shikimate transporter ShiA                                              |
| ARUE_c21060 | cyclase family protein                                                  |
| ARUE_c21070 | thiamine pyrophosphate-requiring enzyme                                 |
| ARUE_c21080 | amylo-alpha-1,6-glucosidase                                             |
| ARUE_c21110 | putative succinate-semialdehyde dehydrogenase [NAD(P)+]                 |
| ARUE_c21120 | putative 4-aminobutyrate transaminase                                   |
| ARUE_c21130 | putative monomeric sarcosine oxidase SoxA                               |
| ARUE_c21140 | glutamine transport ATP-binding protein GlnQ                            |
| ARUE_c21150 | inner membrane amino-acid ABC transporter permease protein YecS         |
| ARUE_c21160 | ABC-type amino acid transport/signal transduction system, extracellular |
| ARUE_c21170 | putative L-2-haloacid dehalogenase, type II                             |
| ARUE_c21180 | FAD-dependent oxidoreductase                                            |
| ARUE_c21190 | NAD(P)+-dependent aldehyde-dehydrogenase superfamily protein            |
| ARUE_c33020 | putative uncharacterized DUF218 domain protein                          |
| ARUE_c33030 | hypothetical protein                                                    |
| ARUE_c33040 | O-antigen polymerase                                                    |
| ARUE_c33050 | putative tyrosine-protein kinase YveL                                   |
| ARUE_c33060 | hypothetical protein                                                    |
| ARUE_c33070 | putative NAD(P)H:flavin oxidoreductase / NAD(P)H nitroreductase         |
| ARUE_c33080 | hypothetical protein                                                    |
| ARUE_c33090 | possible serine O-acetyltransferase                                     |
| ARUE_c33100 | putative glycosyltransferase                                            |
| ARUE_c33110 | glycosyl transferase, WecG/TagA family                                  |
| ARUE_c33120 | GDP-mannose 4,6 dehydratase                                             |
| ARUE_c33130 | GDP-L-fucose synthase                                                   |
| ARUE_c33140 | putative undecaprenylphosphate glycosylphosphotransferase               |
| ARUE_c33150 | UDP-glucose 6-dehydrogenase RkpK                                        |
| ARUE_c33160 | hypothetical protein                                                    |
| ARUE_c36190 | hypothetical protein                                                    |
| ARUE_c36200 | hypothetical protein                                                    |
| ARUE_c36220 | hypothetical protein                                                    |
| ARUE_c36230 | hypothetical protein                                                    |
| ARUE_c36240 | hypothetical protein                                                    |
| ARUE_c36250 | hypothetical protein                                                    |
| ARUE_c36260 | hypothetical protein                                                    |

|             |                                                         |
|-------------|---------------------------------------------------------|
| ARUE_c36270 | hypothetical protein                                    |
| ARUE_c36280 | hypothetical protein                                    |
| ARUE_c37290 | transcriptional regulator, AraC family domain           |
| ARUE_c37300 | hypothetical membrane protein                           |
| ARUE_c37310 | putative xylose repressor XylR                          |
| ARUE_c37320 | D-3-phosphoglycerate dehydrogenase SerA                 |
| ARUE_c37330 | N-sulphoglucosamine sulphohydrolase SGSH                |
| ARUE_c37340 | ABC-type sugar transport system extracellular component |
| ARUE_c37350 | ABC transporter permease protein                        |
| ARUE_c37360 | L-arabinose transport system permease protein AraQ      |
| ARUE_c37370 | putative dehydrogenase                                  |
| ARUE_c37380 | glucosamine-6-phosphate deaminase NagB                  |
