# Supplementary material for: Complete genome sequence and metabolic potential of the quinaldine-degrading bacterium Arthrobacter sp. Rue61a
Source: PubMed Central journal article supplement (PMC3534580; doi:10.1186/1471-2164-13-534), 2012-10-06
Supplement: 1471-2164-13-534-S2.pdf [file 1471-2164-13-534-S2.pdf]

## Additional File 2:

### Transporters and binding proteins of *Arthrobacter* sp. strain Rue61a

**Table S2.1:** Putative transporters and binding proteins of *Arthrobacter* sp. Rue61a with orthologs in *A. aureescens* TC1.

| Locus_tag Rue61a | Annotation                                                     | Evalue    | Locus_tag TC1 |
|------------------|----------------------------------------------------------------|-----------|---------------|
| ARUE_c00100      | integral membrane protein DUF6 domain protein                  | 8.00E-167 | AAur_0012     |
| ARUE_c00420      | putative amino acid permease                                   | 0         | AAur_0045     |
| ARUE_c00490      | YhjE1:inner membrane metabolite transport protein YhjE         | 0         | AAur_0052     |
| ARUE_c00540      | YocS:uncharacterized sodium-dependent transporter YocS         | 2.00E-178 | AAur_0057     |
| ARUE_c00550      | YbaR:putative sulfate transporter YbaR                         | 0         | AAur_0058     |
| ARUE_c00740      | putative major facilitator superfamily (MFS) transporter       | 0         | AAur_0078     |
| ARUE_c00840      | AraQ1:L-arabinose transport system permease protein AraQ       | 1.00E-170 | AAur_0086     |
| ARUE_c00850      | LacF1:lactose transport system permease protein LacF           | 0         | AAur_0087     |
| ARUE_c00860      | putative extracellular sugar-binding protein                   | 0         | AAur_0088     |
| ARUE_c00880      | RutG:putative pyrimidine permease RutG                         | 0         | AAur_0090     |
| ARUE_c00950      | YclF:uncharacterized transporter YclF                          | 0         | AAur_0097     |
| ARUE_c01450      | EmrB/QacA subfamily drug resistance transporter                | 0         | AAur_0148     |
| ARUE_c01550      | putative integral membrane protein DUF6                        | 6.00E-149 | AAur_0160     |
| ARUE_c01840      | putative amino acid permease                                   | 0         | AAur_0190     |
| ARUE_c01890      | PstS:phosphate-binding protein PstS                            | 0         | AAur_0195     |
| ARUE_c01900      | PstC:phosphate transport system permease protein PstC          | 1.00E-156 | AAur_0196     |
| ARUE_c01910      | PstA:phosphate transport system permease protein PstA          | 0         | AAur_0197     |
| ARUE_c01920      | PstB:phosphate import ATP-binding protein PstB (3.6.3.27)      | 2.00E-147 | AAur_0198     |
| ARUE_c01930      | Pit1:putative low-affinity inorganic phosphate transporter Pit | 0         | AAur_0199     |
| ARUE_c02150      | putative high-affinity nickel-transport protein                | 0         | AAur_0222     |
| ARUE_c02350      | YesQ1:putative ABC transporter permease protein YesQ           | 3.00E-174 | AAur_0238     |
| ARUE_c02360      | YesP1:putative ABC transporter permease protein YesP           | 0         | AAur_0239     |
| ARUE_c02540      | YgbN1:inner membrane permease YgbN                             | 0         | AAur_0256     |
| ARUE_c02760      | YdeK:uncharacterized transporter YdeK                          | 8.00E-170 | AAur_0278     |
| ARUE_c02780      | ProP1:proline/betaine transporter ProP                         | 0         | AAur_0280     |

|             |                                                                           |           |               |
|-------------|---------------------------------------------------------------------------|-----------|---------------|
| ARUE_c02910 | HPr2:phosphocarrier protein HPr                                           | 4.00E-45  | AAur_0293     |
| ARUE_c02920 | FruA:PTS system fructose-specific EIIABC component (2.7.1.69)             | 0         | AAur_0294     |
| ARUE_c03060 | EmrB/QacA subfamily drug resistance transporter                           | 4.00E-79  | AAur_pTC20115 |
| ARUE_c03350 | putative transmembrane efflux protein                                     | 0         | AAur_0362     |
| ARUE_c03440 | AzIC:putative azaleucine resistance protein AzIC                          | 6.00E-145 | AAur_0371     |
| ARUE_c03540 | MsbA1:lipid A export ATP-binding/permease protein MsbA                    | 0         | AAur_0381     |
| ARUE_c03550 | putative ABC transporter, ATP-binding protein                             | 0         | AAur_0383     |
| ARUE_c03590 | Fe3+-siderophore ABC transporter, transmembrane subunit                   | 0         | AAur_0387     |
| ARUE_c03600 | Fe3+-siderophore ABC transporter, transmembrane subunit                   | 0         | AAur_0388     |
| ARUE_c03610 | Fe3+-siderophore ABC transporter, ATP-binding protein                     | 2.00E-155 | AAur_0389     |
| ARUE_c03630 | ShiA1:shikimate transporter ShiA                                          | 0         | AAur_0391     |
| ARUE_c03660 | ProY:proline-specific permease ProY                                       | 0         | AAur_0394     |
| ARUE_c03790 | putative permease                                                         | 0         | AAur_0406     |
| ARUE_c03850 | CzcD:putative cation (cobalt-zinc-cadmium) efflux transporter CzcD        | 2.00E-170 | AAur_0412     |
| ARUE_c03880 | YdfC:uncharacterized transporter YdfC                                     | 6.00E-177 | AAur_0415     |
| ARUE_c04120 | YurO1:uncharacterized ABC transporter extracellular- binding protein YurO | 0         | AAur_0443     |
| ARUE_c04130 | YurN1:putative ABC transporter permease protein YurN                      | 0         | AAur_0444     |
| ARUE_c04140 | YurM1:putative ABC transporter permease protein YurM                      | 5.00E-157 | AAur_0445     |
| ARUE_c04280 | AglE:alpha-glucosides-binding extracellular protein AglE                  | 0         | AAur_0459     |
| ARUE_c04290 | AglF:alpha-glucoside transport system permease protein AglF               | 5.00E-179 | AAur_0460     |
| ARUE_c04300 | AglG:alpha-glucoside transport system permease protein AglG               | 0         | AAur_0461     |
| ARUE_c04460 | betaine/carnitine/choline transporter (BCCT) family protein               | 0         | AAur_0477     |
| ARUE_c04820 | putative amino acid permease                                              | 0         | AAur_0511     |
| ARUE_c04920 | putative extracellular sugar-binding protein                              | 0         | AAur_0521     |
| ARUE_c04930 | putative ABC transporter permease protein y4oQ                            | 0         | AAur_0522     |
| ARUE_c04940 | YcjP:inner membrane ABC transporter permease protein YcjP                 | 1.00E-153 | AAur_0523     |
| ARUE_c05020 | ChvE:multiple sugar-binding extracellular receptor ChvE                   | 0         | AAur_0531     |
| ARUE_c05030 | AraG1:L-arabinose transport ATP-binding protein AraG (3.6.3.17)           | 0         | AAur_0532     |
| ARUE_c05040 | XylH1:xylose transport system permease protein XylH                       | 0         | AAur_0533     |
| ARUE_c05080 | YhaQ:uncharacterized ABC transporter ATP-binding protein YhaQ             | 0         | AAur_0537     |
| ARUE_c05090 | putative membrane protein                                                 | 9.00E-166 | AAur_0538     |
| ARUE_c05260 | Fe3+-siderophore ABC transporter, ATP-binding protein                     | 2.00E-152 | AAur_0557     |
| ARUE_c05270 | Fe3+-siderophoreABC transporter, transmembrane subunit                    | 0         | AAur_0558     |

|             |                                                                               |           |           |
|-------------|-------------------------------------------------------------------------------|-----------|-----------|
| ARUE_c05280 | Fe <sup>3+</sup> -siderophore ABC transporter, transmembrane subunit          | 0         | AAur_0559 |
| ARUE_c05290 | Fe <sup>3+</sup> -siderophore binding protein                                 | 0         | AAur_0560 |
| ARUE_c05340 | EmrB/QacA subfamily drug resistance transporter                               | 0         | AAur_0565 |
| ARUE_c05460 | ProP2:proline/betaine transporter ProP                                        | 0         | AAur_0577 |
| ARUE_c05510 | putative amino acid permease                                                  | 0         | AAur_0582 |
| ARUE_c05520 | ShiA2:shikimate transporter ShiA                                              | 0         | AAur_0583 |
| ARUE_c05550 | putative sodium/hydrogen exchanger family protein                             | 0         | AAur_0586 |
| ARUE_c05620 | ArgT:lysine-arginine-ornithine-binding extracellular protein ArgT             | 1.00E-155 | AAur_0593 |
| ARUE_c05630 | ArtQ1:arginine transport system permease protein ArtQ                         | 7.00E-144 | AAur_0594 |
| ARUE_c05640 | GlnQ1:glutamine transport ATP-binding protein GlnQ                            | 6.00E-146 | AAur_0595 |
| ARUE_c05800 | putative extracellular solute-binding domain protein                          | 0         | AAur_0612 |
| ARUE_c05810 | YurN2:putative ABC transporter permease protein YurN                          | 0         | AAur_0613 |
| ARUE_c05820 | YurM2:putative ABC transporter permease protein YurM                          | 3.00E-164 | AAur_0614 |
| ARUE_c05890 | YhjE2:inner membrane metabolite transport protein YhjE                        | 0         | AAur_0621 |
| ARUE_c06090 | YehY:putative osmoprotectant uptake system permease protein YehY              | 9.00E-128 | AAur_0644 |
| ARUE_c06100 | OpuCA1:glycine betaine/carnitine/choline transport ATP- binding protein OpuCA | 0         | AAur_0645 |
| ARUE_c06110 | OpuBB:choline transport system permease protein OpuBB                         | 1.00E-142 | AAur_0646 |
| ARUE_c06120 | OsmF:putative osmoprotectant uptake system substrate- binding protein OsmF    | 3.00E-179 | AAur_0647 |
| ARUE_c06230 | putative major facilitator superfamily (MFS) transporter                      | 0         | AAur_0659 |
| ARUE_c06370 | EmrB/QacA subfamily drug resistance transporter                               | 0         | AAur_0673 |
| ARUE_c06490 | extracellular solute-binding domain protein                                   | 0         | AAur_0685 |
| ARUE_c06500 | YurN3:putative ABC transporter permease protein YurN                          | 2.00E-177 | AAur_0686 |
| ARUE_c06510 | AraQ2:L-arabinose transport system permease protein AraQ                      | 8.00E-169 | AAur_0687 |
| ARUE_c06610 | putative ABC transporter permease protein y4oR                                | 3.00E-160 | AAur_0697 |
| ARUE_c06620 | putative ABC transporter permease protein y4oQ                                | 4.00E-167 | AAur_0698 |
| ARUE_c06630 | putative extracellular sugar-binding protein                                  | 0         | AAur_0699 |
| ARUE_c06660 | uncharacterized 52.8 kDa protein in TAR-I ttuC' 3'region                      | 0         | AAur_0702 |
| ARUE_c06670 | putative integral membrane protein                                            | 2.00E-91  | AAur_0703 |
| ARUE_c06680 | YfiP:UPF0065 protein YfiP                                                     | 0         | AAur_0704 |
| ARUE_c06820 | putative major facilitator superfamily (MFS) transporter                      | 0         | AAur_0720 |
| ARUE_c06900 | putative TRAP transporter solute receptor, TAXI family                        | 1.00E-180 | AAur_0728 |

|             |                                                                               |           |           |
|-------------|-------------------------------------------------------------------------------|-----------|-----------|
| ARUE_c06930 | KgtP1:alpha-ketoglutarate permease KgtP                                       | 0         | AAur_0731 |
| ARUE_c07040 | putative Fe(3+) transport system, ATP binding protein (3.6.3.30)              | 0         | AAur_0751 |
| ARUE_c07050 | putative Fe(3+)-transport system, permease protein (3.6.3.30)                 | 0         | AAur_0752 |
| ARUE_c07060 | putative Fe(3+)-binding extracellular protein (3.6.3.30)                      | 0         | AAur_0753 |
| ARUE_c07590 | EamA:putative amino-acid metabolite efflux pump                               | 7.00E-169 | AAur_0808 |
| ARUE_c07630 | GsiB1:glutathione-binding protein GsiB                                        | 0         | AAur_0812 |
| ARUE_c07640 | GsiC:glutathione transport system permease protein GsiC                       | 0         | AAur_0813 |
| ARUE_c07650 | GsiD1:glutathione transport system permease protein GsiD                      | 8.00E-160 | AAur_0814 |
| ARUE_c07660 | GsiA1:glutathione import ATP-binding protein GsiA                             | 0         | AAur_0815 |
| ARUE_c07710 | hypothetical protein                                                          | 6.00E-149 | AAur_0820 |
| ARUE_c07770 | AppF1:oligopeptide transport ATP-binding proteinAppF                          | 3.00E-150 | AAur_0826 |
| ARUE_c07780 | putative peptide import ATP-binding protein                                   | 0         | AAur_0827 |
| ARUE_c07790 | putative peptide transport system permease protein                            | 5.00E-166 | AAur_0828 |
| ARUE_c07800 | GsiB2:glutathione-binding protein GsiB                                        | 0         | AAur_0829 |
| ARUE_c07890 | HsrA:putative transport protein HsrA                                          | 0         | AAur_0838 |
| ARUE_c07930 | CycA1:D-serine/D-alanine/glycine transporter CycA                             | 0         | AAur_0842 |
| ARUE_c08260 | RbsB1:D-ribose-binding extracellular protein RbsB                             | 3.00E-174 | AAur_0873 |
| ARUE_c08270 | RbsA1:ribose import ATP-binding protein RbsA (3.6.3.17)                       | 0         | AAur_0874 |
| ARUE_c08280 | RbsC1:ribose transport system permease protein RbsC                           | 6.00E-174 | AAur_0875 |
| ARUE_c08320 | YdhP1:inner membrane transport protein YdhP                                   | 0         | AAur_0879 |
| ARUE_c08710 | MalE:maltose-binding protein MalE                                             | 0         | AAur_0918 |
| ARUE_c08720 | MalF:maltose transport system permease protein MalF                           | 0         | AAur_0919 |
| ARUE_c08730 | GanQ:putative arabinogalactan oligomer transport system permease protein GanQ | 1.00E-172 | AAur_0920 |
| ARUE_c08760 | putative major facilitator superfamily (MFS) transporter                      | 0         | AAur_0923 |
| ARUE_c08820 | UgpC1:sn-glycerol-3-phosphate import ATP- bindingprotein UgpC (3.6.3.20)      | 0         | AAur_0929 |
| ARUE_c08950 | YurM3:putative ABC transporter permease protein YurM                          | 2.00E-167 | AAur_0944 |
| ARUE_c08960 | YurN4:putative ABC transporter permease protein YurN                          | 6.00E-166 | AAur_0945 |
| ARUE_c08970 | putative extracellular sugar-binding protein                                  | 0         | AAur_0946 |
| ARUE_c09170 | ShiA3:shikimate transporter ShiA                                              | 0         | AAur_0965 |
| ARUE_c09250 | putative amino acid permease                                                  | 0         | AAur_0973 |
| ARUE_c09360 | EmrB/QacA subfamily drug resistance transporter                               | 0         | AAur_0985 |

|             |                                                                        |           |           |
|-------------|------------------------------------------------------------------------|-----------|-----------|
| ARUE_c09460 | putative membrane protein                                              | 0         | AAur_0995 |
| ARUE_c09570 | putative amino-acid transporter                                        | 1.00E-114 | AAur_1006 |
| ARUE_c09670 | putative transmembrane efflux protein (MFS)                            | 0         | AAur_1015 |
| ARUE_c09820 | TcyC1:L-cystine import ATP-binding protein TcyC                        | 4.00E-149 | AAur_1028 |
| ARUE_c09830 | TcyB:L-cystine transport system permease protein TcyB                  | 9.00E-121 | AAur_1029 |
| ARUE_c09840 | TcyA:L-cystine-binding protein TcyA                                    | 4.00E-149 | AAur_1030 |
| ARUE_c09870 | ABC transporter F family member                                        | 0         | AAur_1033 |
| ARUE_c09880 | YgaD1:putative multidrug export ATP-binding/permease protein YgaD      | 0         | AAur_1034 |
| ARUE_c10090 | putative sodium:solute symporter family protein                        | 0         | AAur_1054 |
| ARUE_c10160 | MFS-type transporter                                                   | 0         | AAur_1061 |
| ARUE_c10170 | ABC transporter ATP-binding protein                                    | 0         | AAur_1062 |
| ARUE_c10180 | ABC transporter ATP-binding protein                                    | 0         | AAur_1063 |
| ARUE_c10360 | KgtP2:alpha-ketoglutarate permease KgtP                                | 0         | AAur_1081 |
| ARUE_c10450 | putative membrane protein                                              | 0         | AAur_1092 |
| ARUE_c10590 | YfaV:inner membrane transport protein YfaV                             | 0         | AAur_1107 |
| ARUE_c10760 | putative major facilitator superfamily (MFS) transporter               | 0         | AAur_1124 |
| ARUE_c10800 | LplB1:protein LplB                                                     | 0         | AAur_1128 |
| ARUE_c10810 | LplC:protein LplC                                                      | 7.00E-159 | AAur_1129 |
| ARUE_c10820 | extracellular solute-binding domain protein                            | 0         | AAur_1130 |
| ARUE_c10970 | YwoD:uncharacterized MFS-type transporter YwoD                         | 0         | AAur_1146 |
| ARUE_c11050 | PuuP:putrescine importer PuuP                                          | 0         | AAur_1167 |
| ARUE_c11140 | uncharacterized transporter Mb2022c                                    | 0         | AAur_1180 |
| ARUE_c11150 | MFS-type transporter                                                   | 0         | AAur_1179 |
| ARUE_c11280 | YceI1:putative metabolite transport protein YceI                       | 0         | AAur_1194 |
| ARUE_c11390 | PhnE:putative phosphonates transport system permease protein PhnE      | 4.00E-157 | AAur_1203 |
| ARUE_c11400 | PhnC:phosphonates import ATP-binding protein PhnC (3.6.3.28)           | 3.00E-144 | AAur_1204 |
| ARUE_c11410 | PhnD:phosphate-binding protein of phosphonate ABC transporter PhnD     | 1.00E-169 | AAur_1205 |
| ARUE_c11470 | ABC transporter ATP-binding protein                                    | 6.00E-126 | AAur_1211 |
| ARUE_c11480 | putative ABC transporter permease protein                              | 0         | AAur_1212 |
| ARUE_c11490 | sugar-binding extracellular receptor protein of ABC transporter system | 0         | AAur_1213 |
| ARUE_c11500 | XylH2:xylose transport system permease protein XylH                    | 0         | AAur_1214 |
| ARUE_c11510 | AraG2:L-arabinose transport ATP-binding protein AraG (3.6.3.17)        | 0         | AAur_1215 |
| ARUE_c11560 | YhdG1:uncharacterized amino acid permease YhdG                         | 0         | AAur_1220 |

|             |                                                                                     |           |           |
|-------------|-------------------------------------------------------------------------------------|-----------|-----------|
| ARUE_c11650 | NodI1:Nod factor export ATP-binding protein I                                       | 9.00E-174 | AAur_1229 |
| ARUE_c11660 | putative ABC-2 type transporter                                                     | 2.00E-151 | AAur_1230 |
| ARUE_c11670 | NodJ:nodulation protein J                                                           | 1.00E-157 | AAur_1231 |
| ARUE_c11680 | ShiA4:shikimate transporter ShiA                                                    | 0         | AAur_1232 |
| ARUE_c11780 | YesO2:putative ABC transporter substrate-binding protein YesO                       | 0         | AAur_1242 |
| ARUE_c11890 | putative basic membrane lipoprotein                                                 | 0         | AAur_1253 |
| ARUE_c11900 | YufO:uncharacterized ABC transporter ATP-binding protein YufO                       | 0         | AAur_1254 |
| ARUE_c11910 | YufP:uncharacterized ABC transporter permease protein YufP                          | 0         | AAur_1255 |
| ARUE_c11920 | YufQ:uncharacterized ABC transporter permease protein YufQ                          | 4.00E-177 | AAur_1256 |
| ARUE_c12070 | BraC:branched-chain amino acid ABC transporter BraC                                 | 0         | AAur_1271 |
| ARUE_c12090 | BraG:high-affinity branched-chain amino acid transport ATP-binding protein BraG     | 5.00E-139 | AAur_1273 |
| ARUE_c12100 | LivG:putative branched-chain amino acid transport ATP- binding protein LivG         | 0         | AAur_1274 |
| ARUE_c12110 | BraE:high-affinity branched-chain amino acid transport system permease protein BraE | 0         | AAur_1275 |
| ARUE_c12120 | inner-membrane translocator                                                         | 4.00E-165 | AAur_1276 |
| ARUE_c12340 | MFS-type transporter                                                                | 0         | AAur_1297 |
| ARUE_c12760 | YfmR:uncharacterized ABC transporter ATP-binding protein YfmR                       | 0         | AAur_1339 |
| ARUE_c12900 | NhaA:Na(+)/H(+) antiporter NhaA                                                     | 0         | AAur_1352 |
| ARUE_c13010 | putative cation efflux family protein                                               | 2.00E-134 | AAur_1364 |
| ARUE_c13060 | YfiG:putative metabolite transport protein YfiG                                     | 0         | AAur_1368 |
| ARUE_c13240 | nitrite extrusion protein                                                           | 0         | AAur_1408 |
| ARUE_c13250 | YhjE3:inner membrane metabolite transport protein YhjE                              | 0         | AAur_1409 |
| ARUE_c13280 | YdfJ:membrane protein YdfJ                                                          | 0         | AAur_1412 |
| ARUE_c13310 | YdjN:uncharacterized symporter YdjN                                                 | 0         | AAur_1415 |
| ARUE_c13540 | SsuB:aliphatic sulfonates import ATP-binding protein SsuB                           | 4.00E-134 | AAur_1439 |
| ARUE_c13550 | SsuC1:putative aliphatic sulfonates transport permease protein SsuC                 | 7.00E-173 | AAur_1440 |
| ARUE_c13560 | putative ABC-type sulfonate transport system                                        | 0         | AAur_1441 |
| ARUE_c13610 | CitN:citrate transporter CitN                                                       | 0         | AAur_1446 |
| ARUE_c13700 | LplB2:protein LplB                                                                  | 0         | AAur_1453 |
| ARUE_c13710 | YtcP:putative ABC transporter permease protein YtcP                                 | 3.00E-173 | AAur_1454 |
| ARUE_c14090 | YdgK:uncharacterized MFS-type transporter YdgK                                      | 0         | AAur_1495 |

|             |                                                                           |           |               |
|-------------|---------------------------------------------------------------------------|-----------|---------------|
| ARUE_c14240 | putative sodium:solute symporter family protein                           | 0         | AAur_1510     |
| ARUE_c14290 | YwcA:uncharacterized symporter YwcA                                       | 0         | AAur_1515     |
| ARUE_c14510 | putative ABC transporter permease protein                                 | 2.00E-171 | AAur_1538     |
| ARUE_c14520 | YurN5:putative ABC transporter permease protein YurN                      | 1.00E-174 | AAur_1539     |
| ARUE_c14530 | YurO2:uncharacterized ABC transporter extracellular- binding protein YurO | 0         | AAur_1540     |
| ARUE_c14630 | putative ABC transporter efflux protein, DrrB family                      | 3.00E-133 | AAur_1550     |
| ARUE_c14640 | NodI2:Nod factor export ATP-binding protein I                             | 2.00E-138 | AAur_1551     |
| ARUE_c15210 | putative major facilitator superfamily (MFS) transporter                  | 0         | AAur_1610     |
| ARUE_c15270 | SLC30A9: zinc transporter 9                                               | 8.00E-169 | AAur_1616     |
| ARUE_c15280 | YdhP2:inner membrane transport protein YdhP                               | 0         | AAur_1617     |
| ARUE_c15780 | DctA1:C4-dicarboxylate transport protein                                  | 0         | AAur_1668     |
| ARUE_c15790 | hypothetical protein                                                      | 2.00E-166 | AAur_1669     |
| ARUE_c16630 | putative major facilitator superfamily (MFS) transporter                  | 0         | AAur_1759     |
| ARUE_c16680 | putative major facilitator superfamily (MFS) transporter                  | 0         | AAur_1763     |
| ARUE_c16900 | TrkA1:Trk system potassium uptake protein TrkA                            | 1.00E-137 | AAur_1784     |
| ARUE_c16910 | TrkA2:Trk system potassium uptake protein TrkA                            | 1.00E-125 | AAur_1786     |
| ARUE_c16920 | YdaO:uncharacterized amino acid permease YdaO                             | 0         | AAur_1787     |
| ARUE_c17140 | YdcO:inner membrane protein YdcO                                          | 0         | AAur_1809     |
| ARUE_c17160 | YfnA1:uncharacterized amino acid permease YfnA                            | 0         | AAur_1811     |
| ARUE_c18160 | amino acid permease-associated region                                     | 2.00E-85  | AAur_pTC20216 |
| ARUE_c20200 | RbsC3:ribose transport system permease protein RbsC                       | 0         | AAur_1888     |
| ARUE_c20210 | RbsB3:D-ribose-binding protein RbsB (3.6.3.17)                            | 0         | AAur_1889     |
| ARUE_c20240 | RbsA3:ribose import ATP-binding protein RbsA (3.6.3.17)                   | 0         | AAur_1892     |
| ARUE_c20380 | KdgT:2-keto-3-deoxygluconate permease                                     | 0         | AAur_1906     |
| ARUE_c20480 | ABC transporter, ATP-binding protein                                      | 0         | AAur_1915     |
| ARUE_c20490 | putative ABC transporter permease protein                                 | 0         | AAur_1916     |
| ARUE_c20500 | extracellular solute-binding domain protein                               | 0         | AAur_1917     |
| ARUE_c20520 | MFS superfamily transporter                                               | 0         | AAur_1919     |
| ARUE_c20850 | putative ABC-type dipeptide transport system                              | 0         | AAur_1953     |
| ARUE_c20860 | putative peptide permease protein                                         | 0         | AAur_1954     |
| ARUE_c20870 | DppC1:dipeptide transport system permease protein DppC                    | 1.00E-172 | AAur_1955     |
| ARUE_c20880 | putative peptide ABC transporter ATP-binding protein y4tR                 | 2.00E-179 | AAur_1956     |
| ARUE_c20890 | AppF2:oligopeptide transport ATP-binding protein AppF                     | 0         | AAur_1957     |

|             |                                                                                      |           |           |
|-------------|--------------------------------------------------------------------------------------|-----------|-----------|
| ARUE_c20930 | putative ABC transporter, ATP-binding protein                                        | 1.00E-126 | AAur_1961 |
| ARUE_c20940 | MntB1:ABC-type Mn <sup>2+</sup> transport systems, permease component                | 2.00E-172 | AAur_1962 |
| ARUE_c20960 | FimA:manganese ABC transporter substrate-binding lipoprotein FimA                    | 2.00E-167 | AAur_1964 |
| ARUE_c21220 | DdpA:putative D,D-dipeptide-binding extracellular protein DdpA                       | 0         | AAur_1969 |
| ARUE_c21230 | putative peptide transport system permease protein                                   | 4.00E-166 | AAur_1970 |
| ARUE_c21240 | DppC2:dipeptide transport system permease protein DppC                               | 4.00E-154 | AAur_1971 |
| ARUE_c21250 | YejF:uncharacterized ABC transporter ATP-binding protein YejF                        | 0         | AAur_1972 |
| ARUE_c21410 | putative ABC-type sugar transport system                                             | 0         | AAur_1988 |
| ARUE_c21420 | YphD:putative ABC transporter permease protein YphD                                  | 0         | AAur_1989 |
| ARUE_c21430 | putative ribose/galactose/methyl galactoside import ATP-binding protein 2 (3.6.3.17) | 3.00E-176 | AAur_1990 |
| ARUE_c21540 | YfnA2:uncharacterized amino acid permease YfnA                                       | 0         | AAur_2001 |
| ARUE_c21590 | putative Na <sup>+</sup> /H <sup>+</sup> antiporter                                  | 0         | AAur_2006 |
| ARUE_c21680 | Fe <sup>3+</sup> -siderophore ABC transporter, ATP-binding protein                   | 1.00E-153 | AAur_2015 |
| ARUE_c21690 | Fe <sup>3+</sup> -siderophore binding protein, FhuD family                           | 0         | AAur_2016 |
| ARUE_c21700 | Fe <sup>3+</sup> -hydroxamate ABC transporter, permease subunit                      | 0         | AAur_2017 |
| ARUE_c21790 | putative major facilitator superfamily (MFS) transporter                             | 0         | AAur_2026 |
| ARUE_c21970 | putative amino acid permease                                                         | 0         | AAur_2043 |
| ARUE_c22050 | putative permease component of ABC transport system                                  | 3.00E-158 | AAur_2051 |
| ARUE_c22060 | ATPase component of putative multidrug ABC-type transport system; BcrA-like          | 0         | AAur_2052 |
| ARUE_c22150 | Pit2:putative low-affinity inorganic phosphate transporter Pit                       | 0         | AAur_2060 |
| ARUE_c22290 | putative major facilitator superfamily (MFS) transporter                             | 0         | AAur_2074 |
| ARUE_c22570 | putative ABC transporter protein                                                     | 6.00E-140 | AAur_2101 |
| ARUE_c22580 | NodI3:Nod factor export ATP-binding protein I                                        | 2.00E-180 | AAur_2102 |
| ARUE_c22600 | SufB:FeS cluster assembly protein SufB                                               | 0         | AAur_2104 |
| ARUE_c22610 | SufD:putative FeS assembly protein SufD                                              | 0         | AAur_2105 |
| ARUE_c22630 | SufC:putative FeS assembly ATPase SufC                                               | 9.00E-147 | AAur_2107 |
| ARUE_c22680 | putative cobalt transport protein                                                    | 6.00E-117 | AAur_2111 |
| ARUE_c22690 | putative ABC transporter ATP-binding protein                                         | 1.00E-134 | AAur_2113 |
| ARUE_c22710 | YdiF:uncharacterized ABC transporter ATP-binding protein YdiF                        | 0         | AAur_2115 |
| ARUE_c22780 | RbsA4:ribose import ATP-binding protein RbsA (3.6.3.17)                              | 0         | AAur_2122 |
| ARUE_c22810 | YlmA:uncharacterized ABC transporter ATP-binding protein YlmA                        | 5.00E-153 | AAur_2125 |



|             |                                                                                      |           |           |
|-------------|--------------------------------------------------------------------------------------|-----------|-----------|
| ARUE_c23100 | putative glycosyl transferase / polysaccharide biosynthesis domain protein           | 0         | AAur_2155 |
| ARUE_c23390 | TatA:twin-arginine translocation protein, TatA/E                                     | 1.00E-45  | AAur_2184 |
| ARUE_c23400 | TatC:Sec-independent protein translocase protein TatC                                | 3.00E-153 | AAur_2185 |
| ARUE_c24030 | GlpF:glycerol uptake facilitator protein GlpF                                        | 5.00E-145 | AAur_2248 |
| ARUE_c24090 | PcaK:4-hydroxybenzoate transporter PcaK                                              | 0         | AAur_2254 |
| ARUE_c24500 | SecD:protein-export membrane protein SecD                                            | 0         | AAur_2295 |
| ARUE_c24830 | YfiL:uncharacterized ABC transporter ATP-binding protein YfiL                        | 0         | AAur_2328 |
| ARUE_c24840 | putative ABC transporter, integral membrane protein                                  | 5.00E-158 | AAur_2329 |
| ARUE_c25050 | putative ABC transporter permease protein ORF1                                       | 2.00E-162 | AAur_2350 |
| ARUE_c25060 | AmyD:putative ABC transporter permease protein AmyD                                  | 1.00E-159 | AAur_2351 |
| ARUE_c25070 | extracellular solute-binding domain protein                                          | 0         | AAur_2352 |
| ARUE_c25470 | MscS:putative mechanosensitive ion channel protein MscS                              | 1.00E-126 | AAur_2391 |
| ARUE_c25510 | ABC transporter ATP-binding protein                                                  | 0         | AAur_2395 |
| ARUE_c25810 | ShiA6:shikimate transporter ShiA                                                     | 0         | AAur_2426 |
| ARUE_c26130 | Ffh:signal recognition particle protein Ffh                                          | 0         | AAur_2458 |
| ARUE_c26160 | Amt1:putative ammonia channel                                                        | 0         | AAur_2461 |
| ARUE_c26170 | putative transmembrane efflux protein (MFS)                                          | 0         | AAur_2462 |
| ARUE_c26180 | FtsY:cell division protein FtsY                                                      | 0         | AAur_2463 |
| ARUE_c26220 | putative major facilitator superfamily (MFS) transporter                             | 0         | AAur_2467 |
| ARUE_c26560 | ATPase component of ABC-type antimicrobial peptide transport system; BceA-like       | 7.00E-148 | AAur_2501 |
| ARUE_c26570 | permease protein of ABC transporter                                                  | 0         | AAur_2502 |
| ARUE_c26590 | ATPase component of ABC-type transport system                                        | 4.00E-140 | AAur_2504 |
| ARUE_c26740 | HbpA:heme-binding protein A                                                          | 0         | AAur_2519 |
| ARUE_c26760 | putative cation/multidrug efflux pump, AcrB family                                   | 0         | AAur_2521 |
| ARUE_c26820 | putative anion permease, ArsB/NhaD superfamily                                       | 0         | AAur_2526 |
| ARUE_c26920 | AroP:aromatic amino acid transport protein AroP                                      | 0         | AAur_2537 |
| ARUE_c26990 | YhjE4:inner membrane metabolite transport protein YhjE                               | 0         | AAur_2544 |
| ARUE_c27020 | putative amino acid permease                                                         | 0         | AAur_2547 |
| ARUE_c27050 | ABC transporter ATP-binding protein                                                  | 5.00E-160 | AAur_2550 |
| ARUE_c27060 | SsuC2:putative aliphatic sulfonates transport permease protein SsuC                  | 8.00E-137 | AAur_2551 |
| ARUE_c27070 | putative ABC-type nitrate/sulfonate/bicarbonate transport system, permease component | 2.00E-140 | AAur_2552 |

|             |                                                                                                             |           |           |
|-------------|-------------------------------------------------------------------------------------------------------------|-----------|-----------|
| ARUE_c27080 | putative sulfonate ABC transporter, solute- binding protein                                                 | 0         | AAur_2553 |
| ARUE_c27110 | putative major facilitator superfamily (MFS) transporter                                                    | 0         | AAur_2555 |
| ARUE_c27140 | AqpZ:aquaporin Z                                                                                            | 6.00E-173 | AAur_2559 |
| ARUE_c27210 | YhcG2:uncharacterized ABC transporter ATP-binding protein YhcG                                              | 3.00E-172 | AAur_2566 |
| ARUE_c27350 | putative integral membrane transport protein                                                                | 0         | AAur_2580 |
| ARUE_c27360 | NodI4:Nod factor export ATP-binding protein I                                                               | 7.00E-176 | AAur_2581 |
| ARUE_c27500 | AtpD:ATP synthase subunit beta (3.6.3.14)                                                                   | 0         | AAur_2594 |
| ARUE_c27510 | AtpG:ATP synthase gamma chain                                                                               | 6.00E-161 | AAur_2595 |
| ARUE_c27520 | AtpA:ATP synthase subunit alpha (3.6.3.14)                                                                  | 0         | AAur_2596 |
| ARUE_c27540 | AtpF:ATP synthase subunit b                                                                                 | 6.00E-96  | AAur_2598 |
| ARUE_c27550 | ATP synthase F0, C subunit (3.6.3.14)                                                                       | 5.00E-35  | AAur_2599 |
| ARUE_c27560 | AtpB:ATP synthase subunit a                                                                                 | 5.00E-149 | AAur_2600 |
| ARUE_c27870 | putative ABC-type Mn <sup>2+</sup> /Zn <sup>2+</sup> /Fe <sup>2+</sup> transport system, permease component | 4.00E-158 | AAur_2629 |
| ARUE_c27880 | MntB2:manganese transport system ATP-binding protein MntB                                                   | 5.00E-154 | AAur_2631 |
| ARUE_c27890 | putative solute binding protein                                                                             | 0         | AAur_2632 |
| ARUE_c28060 | EmrB/QacA subfamily drug resistance transporter                                                             | 0         | AAur_2649 |
| ARUE_c28110 | FtsX:cell division protein FtsX                                                                             | 5.00E-168 | AAur_2655 |
| ARUE_c28120 | FtsE:cell division ATP-binding protein FtsE                                                                 | 2.00E-155 | AAur_2656 |
| ARUE_c28290 | RfbB:O-antigen export system ATP-binding protein RfbB                                                       | 2.00E-135 | AAur_2673 |
| ARUE_c28300 | RfbA:O-antigen export system permease protein RfbA                                                          | 6.00E-163 | AAur_2674 |
| ARUE_c28600 | GsiA2:glutathione import ATP-binding protein GsiA                                                           | 0         | AAur_2706 |
| ARUE_c28610 | GsiD2:glutathione transport system permease protein GsiD                                                    | 7.00E-170 | AAur_2707 |
| ARUE_c28620 | DppB1:dipeptide transport system permease protein DppB                                                      | 0         | AAur_2708 |
| ARUE_c28630 | DppA:dipeptide transport protein DppA                                                                       | 0         | AAur_2709 |
| ARUE_c28740 | GnuT:gluconate permease GnuT                                                                                | 0         | AAur_2720 |
| ARUE_c28960 | putative amino acid ABC transporter                                                                         | 0         | AAur_2743 |
| ARUE_c28970 | ArtQ2:arginine transport system permease protein ArtQ                                                       | 8.00E-140 | AAur_2744 |
| ARUE_c28980 | TcyC2:L-cystine import ATP-binding protein TcyC                                                             | 2.00E-135 | AAur_2745 |
| ARUE_c29280 | putative magnesium transporter MgtE (contains CBS domain)                                                   | 0         | AAur_2775 |
| ARUE_c29310 | putative twin-arginine translocation protein                                                                | 9.00E-69  | AAur_2778 |
| ARUE_c29380 | GluA:glutamate transport ATP-binding protein GluA                                                           | 1.00E-139 | AAur_2785 |
| ARUE_c29390 | GluB:glutamate-binding protein                                                                              | 2.00E-165 | AAur_2786 |
| ARUE_c29400 | GlnM1:putative glutamine ABC transporter permease protein GlnM                                              | 5.00E-116 | AAur_2787 |

|             |                                                                                                   |           |           |
|-------------|---------------------------------------------------------------------------------------------------|-----------|-----------|
| ARUE_c29410 | GluD:glutamate transport system permease protein GluD                                             | 5.00E-147 | AAur_2788 |
| ARUE_c29540 | GsiA3:glutathione import ATP-binding protein GsiA                                                 | 0         | AAur_2801 |
| ARUE_c29550 | OppC:oligopeptide transport system permease protein OppC                                          | 0         | AAur_2802 |
| ARUE_c29560 | DppB2:dipeptide transport system permease protein DppB                                            | 5.00E-171 | AAur_2803 |
| ARUE_c29580 | OppA:oligopeptide-binding protein OppA                                                            | 0         | AAur_2804 |
| ARUE_c29680 | ProX:glycine betaine/choline-binding protein of an ABC-type transport system                      | 2.00E-178 | AAur_2814 |
| ARUE_c29690 | ProZ:ABC-type proline/glycine betaine transport systems, permease component                       | 1.00E-133 | AAur_2815 |
| ARUE_c29700 | ProW:ABC-type proline/glycine betaine transport systems, permease component                       | 5.00E-132 | AAur_2816 |
| ARUE_c29710 | OpuCA2:glycine betaine/carnitine/choline transport ATP- binding protein OpuCA                     | 0         | AAur_2817 |
| ARUE_c29720 | GTPase, YjeQ/EngC-like                                                                            | 0         | AAur_2818 |
| ARUE_c29800 | YnfM:inner membrane transport protein YnfM                                                        | 0         | AAur_2826 |
| ARUE_c29830 | putative major facilitator superfamily (MFS) transporter                                          | 0         | AAur_2829 |
| ARUE_c29860 | putative CorA-like metal ion (Mg <sup>2+</sup> /Co <sup>2+</sup> ) transporter                    | 0         | AAur_2832 |
| ARUE_c30130 | PTS system, IIA component                                                                         | 3.00E-87  | AAur_2860 |
| ARUE_c30190 | MsbA2:lipid A export ATP-binding/permease protein MsbA                                            | 0         | AAur_2866 |
| ARUE_c30730 | UgpA2:sn-glycerol-3-phosphate transport system permease protein UgpA                              | 0         | AAur_2924 |
| ARUE_c30740 | UgpE:sn-glycerol-3-phosphate transport system permease protein UgpE                               | 6.00E-161 | AAur_2925 |
| ARUE_c30750 | UgpB:sn-glycerol-3-phosphate-binding extracellular protein UgpB                                   | 0         | AAur_2926 |
| ARUE_c30780 | SecY:preprotein translocase subunit SecY                                                          | 0         | AAur_2929 |
| ARUE_c31480 | YbjJ1:inner membrane protein YbjJ                                                                 | 0         | AAur_3000 |
| ARUE_c31540 | TauA2:putative ABC-type nitrate/sulfonate/bicarbonate transporter, substrate-binding protein TauA | 0         | AAur_3006 |
| ARUE_c31550 | TauB2:putative ABC-type nitrate/sulfonate/bicarbonate transporter, ATP-binding protein TauB       | 1.00E-166 | AAur_3007 |
| ARUE_c31560 | TauC2:putative ABC-type nitrate/sulfonate/bicarbonate transporter, permease protein TauC          | 2.00E-167 | AAur_3008 |
| ARUE_c31600 | MsmG:multiple sugar-binding transport system permease protein MsmG                                | 2.00E-171 | AAur_3012 |
| ARUE_c31610 | MsmF:multiple sugar-binding transport system permease protein MsmF                                | 9.00E-166 | AAur_3013 |
| ARUE_c31620 | extracellular solute-binding domain protein                                                       | 0         | AAur_3014 |
| ARUE_c31640 | Na <sup>+</sup> /H <sup>+</sup> antiporter                                                        | 0         | AAur_3016 |

|             |                                                                                  |           |           |
|-------------|----------------------------------------------------------------------------------|-----------|-----------|
| ARUE_c31760 | putative amino acid permease                                                     | 0         | AAur_3027 |
| ARUE_c31790 | putative solute-binding lipoprotein                                              | 0         | AAur_3030 |
| ARUE_c31800 | LacF2:lactose transport system permease protein LacF                             | 6.00E-176 | AAur_3031 |
| ARUE_c31810 | AraQ3:L-arabinose transport system permease protein AraQ                         | 1.00E-172 | AAur_3032 |
| ARUE_c31830 | putative major facilitator superfamily (MFS) transporter                         | 0         | AAur_3034 |
| ARUE_c31900 | ATPase component of putative ABC-type transport system                           | 3.00E-180 | AAur_3041 |
| ARUE_c31910 | putative permease protein of ABC-type transport system                           | 4.00E-153 | AAur_3042 |
| ARUE_c31960 | NosF:copper transport ATP-binding protein NosF                                   | 0         | AAur_3047 |
| ARUE_c31970 | putative ABC transporter, permease protein                                       | 5.00E-148 | AAur_3049 |
| ARUE_c32000 | putative voltage-gated potassium channel protein                                 | 8.00E-143 | AAur_3051 |
| ARUE_c32050 | major facilitator superfamily (MFS) transporter                                  | 0         | AAur_3056 |
| ARUE_c32100 | YhdG2:uncharacterized amino acid permease YhdG                                   | 0         | AAur_3061 |
| ARUE_c32160 | RarD:protein RarD                                                                | 0         | AAur_3067 |
| ARUE_c32210 | putative major facilitator superfamily (MFS) transporter                         | 0         | AAur_3072 |
| ARUE_c32340 | putative nitrate/sulfonate ABC transporter, permease protein                     | 6.00E-176 | AAur_3086 |
| ARUE_c32350 | putative nitrate/sulfonate ABC transporter, ATP binding protein                  | 5.00E-136 | AAur_3087 |
| ARUE_c32360 | putative ABC transporter, substrate-binding protein, aliphatic sulfonates family | 0         | AAur_3088 |
| ARUE_c32570 | GlnH:glutamine-binding extracellular protein GlnH                                | 5.00E-146 | AAur_3104 |
| ARUE_c32580 | GlnM2:putative glutamine ABC transporter permease protein GlnM                   | 5.00E-145 | AAur_3105 |
| ARUE_c32590 | GlnQ3:glutamine transport ATP-binding protein GlnQ                               | 5.00E-148 | AAur_3106 |
| ARUE_c32690 | putative ABC transporter permease protein ORF2                                   | 6.00E-161 | AAur_3120 |
| ARUE_c32700 | YurN6:putative ABC transporter permease protein YurN                             | 0         | AAur_3121 |
| ARUE_c32710 | extracellular solute-binding domain protein                                      | 0         | AAur_3122 |
| ARUE_c32760 | putative major facilitator superfamily (MFS) transporter                         | 0         | AAur_3127 |
| ARUE_c32840 | putative cobalt-zinc-cadmium efflux permease                                     | 0         | AAur_3137 |
| ARUE_c32850 | putative lipoprotein                                                             | 2.00E-87  | AAur_3138 |
| ARUE_c33890 | putative binding protein                                                         | 0         | AAur_3251 |
| ARUE_c33900 | putative ABC transporter permease protein                                        | 0         | AAur_3252 |
| ARUE_c33910 | YurM4:putative ABC transporter permease protein YurM                             | 5.00E-158 | AAur_3253 |
| ARUE_c34010 | AnsP1:L-asparagine permease AnsP                                                 | 0         | AAur_3263 |
| ARUE_c34050 | TlrC:tylosin resistance ATP-binding protein TlrC                                 | 0         | AAur_3267 |
| ARUE_c34080 | permease component of ABC-type metal cation transporter                          | 4.00E-147 | AAur_3270 |

|             |                                                                                |           |           |
|-------------|--------------------------------------------------------------------------------|-----------|-----------|
| ARUE_c34090 | ATPase component of ABC-type metal cation transporter                          | 1.00E-137 | AAur_3271 |
| ARUE_c34100 | metal-binding extracellular protein interacting with ABC transporter           | 2.00E-179 | AAur_3272 |
| ARUE_c34250 | CcsA:cytochrome c biogenesis protein CcsA                                      | 0         | AAur_3286 |
| ARUE_c34410 | putative transmembrane efflux protein (MFS)                                    | 0         | AAur_3305 |
| ARUE_c34430 | YesQ3:putative ABC transporter permease protein YesQ                           | 6.00E-172 | AAur_3307 |
| ARUE_c34440 | YesP2:putative ABC transporter permease protein YesP                           | 0         | AAur_3308 |
| ARUE_c34450 | YesO3:putative ABC transporter substrate- bindingprotein YesO                  | 0         | AAur_3309 |
| ARUE_c34470 | YesO4:putative ABC transporter substrate- bindingprotein YesO                  | 0         | AAur_3311 |
| ARUE_c34480 | YesQ4:putative ABC transporter permease protein YesQ                           | 1.00E-179 | AAur_3312 |
| ARUE_c34490 | YesP3:putative ABC transporter permease protein YesP                           | 0         | AAur_3313 |
| ARUE_c34640 | TrkH-like potassium uptake protein                                             | 0         | AAur_3328 |
| ARUE_c34650 | potassium transport system dinucleotide-binding component TrkA                 | 4.00E-151 | AAur_3329 |
| ARUE_c34930 | ATPase component of ABC-type antimicrobial peptide transport system; BceA-like | 3.00E-143 | AAur_3355 |
| ARUE_c34940 | putative permease protein of ABC-type transport system                         | 0         | AAur_3356 |
| ARUE_c34970 | YurN7:putative ABC transporter permease protein YurN                           | 8.00E-166 | AAur_3359 |
| ARUE_c34980 | YurM5:putative ABC transporter permease protein YurM                           | 1.00E-172 | AAur_3360 |
| ARUE_c34990 | putative extracellular sugar-binding protein                                   | 0         | AAur_3361 |
| ARUE_c35090 | MmpL:putative membrane protein MmpL                                            | 0         | AAur_3372 |
| ARUE_c35140 | YgaD2:putative multidrug export ATP-binding/permease protein YgaD              | 0         | AAur_3378 |
| ARUE_c35150 | YknV:uncharacterized ABC transporter ATP-binding protein YknV                  | 0         | AAur_3379 |
| ARUE_c35220 | DctA2:C4-dicarboxylate transport protein DctA                                  | 0         | AAur_3387 |
| ARUE_c35250 | PucI:putative allantoin permease PucI                                          | 0         | AAur_3390 |
| ARUE_c35330 | PbuG:guanine/hypoxanthine permease PbuG                                        | 0         | AAur_3397 |
| ARUE_c35400 | PbuX:xanthine permease PbuX                                                    | 0         | AAur_3403 |
| ARUE_c35500 | YyaJ:putative metabolite transport protein YyaJ                                | 0         | AAur_3413 |
| ARUE_c35550 | OpdE:transcription regulatory protein OpdE                                     | 0         | AAur_3418 |
| ARUE_c35560 | Amt2:putative ammonia channel                                                  | 0         | AAur_3419 |
| ARUE_c35580 | IcfA:carbonic anhydrase IcfA (4.2.1.1)                                         | 0         | AAur_3421 |
| ARUE_c35670 | YceI2:putative metabolite transport protein YceI                               | 0         | AAur_3430 |
| ARUE_c35820 | ABC transporter ATP-binding protein                                            | 0         | AAur_3463 |
| ARUE_c35830 | ABC transporter ATP-binding protein                                            | 0         | AAur_3464 |
| ARUE_c36030 | YdbJ:uncharacterized ABC transporter ATP-binding protein YdbJ                  | 1.00E-129 | AAur_3486 |

|             |                                                                                |           |           |
|-------------|--------------------------------------------------------------------------------|-----------|-----------|
| ARUE_c36150 | putative ABC transporter permease protein                                      | 2.00E-159 | AAur_3499 |
| ARUE_c36160 | putative ABC transporter permease protein                                      | 2.00E-172 | AAur_3500 |
| ARUE_c36170 | putative ABC transporter-binding protein                                       | 0         | AAur_3501 |
| ARUE_c36450 | YgaY:uncharacterized transporter YgaY                                          | 0         | AAur_3519 |
| ARUE_c36590 | ModC:molybdenum import ATP-binding protein ModC (3.6.3.29)                     | 0         | AAur_3533 |
| ARUE_c36600 | ModB:molybdenum transport system permease protein ModB                         | 5.00E-129 | AAur_3534 |
| ARUE_c36610 | ModA:molybdate-binding protein                                                 | 1.00E-146 | AAur_3535 |
| ARUE_c36700 | putative small multidrug resistance protein                                    | 8.00E-53  | AAur_3544 |
| ARUE_c36710 | putative small multidrug resistance protein                                    | 4.00E-63  | AAur_3545 |
| ARUE_c36750 | putative major facilitator superfamily (MFS) transporter                       | 0         | AAur_3549 |
| ARUE_c36800 | KgtP4:alpha-ketoglutarate permease KgtP                                        | 0         | AAur_3554 |
| ARUE_c36810 | YycB2:uncharacterized transporter YycB                                         | 0         | AAur_3555 |
| ARUE_c36920 | NatA:ATP-binding transport protein NatA                                        | 0         | AAur_3565 |
| ARUE_c36930 | putative membrane protein (DUF990 family)                                      | 8.00E-155 | AAur_3566 |
| ARUE_c36940 | putative membrane protein (DUF990 family)                                      | 6.00E-149 | AAur_3567 |
| ARUE_c36980 | putative transmembrane efflux protein (MFS)                                    | 0         | AAur_3570 |
| ARUE_c37170 | KgtP5:alpha-ketoglutarate permease KgtP                                        | 0         | AAur_3588 |
| ARUE_c37480 | putative cation-transporting ATPase                                            | 0         | AAur_3604 |
| ARUE_c37590 | putative translocator protein, LysE family                                     | 1.00E-112 | AAur_3625 |
| ARUE_c37680 | major intrinsic protein (MIP) superfamily protein                              | 4.00E-134 | AAur_3632 |
| ARUE_c37720 | putative membrane protein                                                      | 0         | AAur_3636 |
| ARUE_c37790 | RhtB:homoserine/homoserine lactone efflux protein                              | 5.00E-116 | AAur_3643 |
| ARUE_c37830 | putative transmembrane efflux protein (MFS)                                    | 0         | AAur_3647 |
| ARUE_c37910 | YbgF:uncharacterized amino acid permease YbgF                                  | 0         | AAur_3655 |
| ARUE_c37960 | putative sulfate transporter                                                   | 0         | AAur_3661 |
| ARUE_c38060 | putative cobalt transport protein                                              | 1.00E-146 | AAur_3670 |
| ARUE_c38070 | YkoD:putative HMP/thiamine import ATP-binding protein YkoD                     | 0         | AAur_3672 |
| ARUE_c38110 | putative multisubunit Na <sup>+</sup> /H <sup>+</sup> antiporter, MnhG subunit | 8.00E-71  | AAur_3676 |
| ARUE_c38120 | putative multisubunit Na <sup>+</sup> /H <sup>+</sup> antiporter, MnhE subunit | 1.00E-101 | AAur_3678 |
| ARUE_c38130 | MrpD:Na <sup>(+)</sup> /H <sup>(+)</sup> antiporter subunit D                  | 0         | AAur_3679 |
| ARUE_c38140 | putative multisubunit Na <sup>+</sup> /H <sup>+</sup> antiporter, MnhC subunit | 3.00E-90  | AAur_3680 |
| ARUE_c38150 | PhaAB:putative K <sup>(+)</sup> /H <sup>(+)</sup> antiporter subunit A/B       | 0         | AAur_3681 |
| ARUE_c38160 | putative major facilitator superfamily (MFS) transporter                       | 0         | AAur_3682 |

|             |                                                                       |           |           |
|-------------|-----------------------------------------------------------------------|-----------|-----------|
| ARUE_c38180 | YhaU:K(+)/H(+) antiporter YhaU                                        | 0         | AAur_3684 |
| ARUE_c38270 | putative transmembrane efflux protein                                 | 0         | AAur_3694 |
| ARUE_c38540 | putative integral membrane permease                                   | 6.00E-167 | AAur_3721 |
| ARUE_c38570 | putative ABC transporter, solute binding protein                      | 0         | AAur_3724 |
| ARUE_c38660 | putative ABC transporter, solute binding protein                      | 0         | AAur_3733 |
| ARUE_c38670 | TcyC3:L-cystine import ATP-binding protein TcyC                       | 6.00E-141 | AAur_3734 |
| ARUE_c38680 | YecS2:inner membrane amino-acid ABC transporter permease protein YecS | 0         | AAur_3735 |
| ARUE_c38960 | Fe3+-siderophore ABC transporter, ATP-binding protein                 | 7.00E-153 | AAur_3763 |
| ARUE_c38970 | Fe3+-siderophore ABC transporter, permease subunit                    | 0         | AAur_3764 |
| ARUE_c38980 | Fe3+-siderophore ABC transporter, permease subunit                    | 0         | AAur_3765 |
| ARUE_c38990 | Fe3+-siderophore binding protein, FepB family                         | 0         | AAur_3766 |
| ARUE_c39170 | putative integral membrane protein                                    | 0         | AAur_3783 |
| ARUE_c39290 | AnsP2:L-asparagine permease                                           | 0         | AAur_3795 |
| ARUE_c39480 | putative translocator protein, LysE family                            | 8.00E-106 | AAur_3817 |
| ARUE_c39590 | ProP4:proline/betaine transporter ProP                                | 0         | AAur_3823 |
| ARUE_c39750 | putative major facilitator superfamily (MFS) transporter              | 0         | AAur_3841 |
| ARUE_c39770 | YusP:uncharacterized MFS-type transporter YusP                        | 0         | AAur_3843 |
| ARUE_c39870 | Gtr:glucose transport protein                                         | 0         | AAur_3844 |
| ARUE_c39880 | YfmO:multidrug efflux protein YfmO                                    | 0         | AAur_3845 |
| ARUE_c39930 | DrrA:daunorubicin/doxorubicin resistance ATP-binding protein DrrA     | 5.00E-140 | AAur_3850 |
| ARUE_c39940 | putative ABC transporter, efflux permease protein                     | 6.00E-140 | AAur_3851 |
| ARUE_c39950 | CycA2:D-serine/D-alanine/glycine transporter CycA                     | 0         | AAur_3852 |
| ARUE_c39970 | Fe3+-siderophore ABC transporter, ATP-binding protein, CeuD-like      | 4.00E-141 | AAur_3854 |
| ARUE_c39980 | Fe3+-siderophore ABC transporter, permease subunit, CeuC-like         | 1.00E-167 | AAur_3855 |
| ARUE_c39990 | Fe3+-siderophore ABC transporter, permease subunit, CeuB/CeuC-like    | 2.00E-179 | AAur_3856 |
| ARUE_c40000 | siderophore binding protein, CeuA-like                                | 1.00E-175 | AAur_3857 |
| ARUE_c40020 | MtlA:PTS system mannitol-specific EIICBA component (2.7.1.69)         | 0         | AAur_3859 |
| ARUE_c40040 | PtsI:phosphoenolpyruvate-protein phosphotransferase PtsI (2.7.3.9)    | 0         | AAur_3861 |
| ARUE_c40050 | HPr4:phosphocarrier protein HPr                                       | 6.00E-45  | AAur_3862 |
| ARUE_c40170 | hypothetical protein                                                  | 0         | AAur_3875 |
| ARUE_c40180 | uncharacterized ABC transporter ATP-binding protein                   | 0         | AAur_3876 |
| ARUE_c40190 | putative peptide transport permease protein                           | 0         | AAur_3877 |
| ARUE_c40200 | putative peptide transport permease protein                           | 0         | AAur_3878 |

|             |                                                                                   |           |           |
|-------------|-----------------------------------------------------------------------------------|-----------|-----------|
| ARUE_c40310 | YeeF:inner membrane transport protein YeeF                                        | 0         | AAur_3887 |
| ARUE_c40470 | ProP5:proline/betaine transporter ProP                                            | 0         | AAur_3902 |
| ARUE_c40820 | putative extracellular solute-binding lipoprotein                                 | 0         | AAur_3941 |
| ARUE_c40830 | putative ABC-type sugar transport system, permease component                      | 3.00E-177 | AAur_3942 |
| ARUE_c40840 | AraQ6:L-arabinose transport system permease protein AraQ                          | 5.00E-174 | AAur_3943 |
| ARUE_c40870 | putative major facilitator superfamily (MFS) transporter                          | 0         | AAur_3946 |
| ARUE_c40920 | putative cytosine/purine/uracil/thiamine/allantoin permease family protein        | 0         | AAur_3952 |
| ARUE_c40990 | putative amino acid permease                                                      | 0         | AAur_3959 |
| ARUE_c41010 | putative ZIP zinc transporter                                                     | 4.00E-140 | AAur_3961 |
| ARUE_c41040 | putative integral membrane protein (DMT superfamily)                              | 6.00E-172 | AAur_3965 |
| ARUE_c41140 | EmrB/QacA subfamily drug resistance transporter                                   | 0         | AAur_3973 |
| ARUE_c41220 | BenK1:benzoate transport protein                                                  | 0         | AAur_3981 |
| ARUE_c41260 | putative integral membrane protein                                                | 4.00E-137 | AAur_3985 |
| ARUE_c41500 | YxlA:putative purine-cytosine permease YxlA                                       | 0         | AAur_4010 |
| ARUE_c41530 | MscL:large conductance mechanosensitive channelprotein MscL                       | 6.00E-82  | AAur_4013 |
| ARUE_c41910 | ShiA7:shikimate transporter ShiA                                                  | 0         | AAur_4048 |
| ARUE_c42020 | YgbN2:inner membrane permease YgbN                                                | 0         | AAur_4059 |
| ARUE_c42090 | putative integral membrane permease                                               | 7.00E-168 | AAur_4066 |
| ARUE_c42220 | AraQ7:L-arabinose transport system permease protein AraQ                          | 4.00E-170 | AAur_4079 |
| ARUE_c42230 | UgpA3:sn-glycerol-3-phosphate transport system permease protein UgpA              | 8.00E-179 | AAur_4080 |
| ARUE_c42240 | putative extracellular solute-binding protein                                     | 0         | AAur_4081 |
| ARUE_c42350 | putative ABC transporter permease protein y4oR                                    | 8.00E-166 | AAur_4090 |
| ARUE_c42360 | putative ABC transporter permease protein                                         | 0         | AAur_4091 |
| ARUE_c42370 | putative extracellular sugar-binding protein                                      | 0         | AAur_4092 |
| ARUE_c42400 | putative heavy metal-translocating (Cu+/Ag+) P- type ATPase, CopA-like            | 0         | AAur_4095 |
| ARUE_c42430 | putative integral membrane protein DUF6 domain                                    | 0         | AAur_4098 |
| ARUE_c42470 | putative MATE efflux family protein                                               | 0         | AAur_4102 |
| ARUE_c42600 | ShiA8:shikimate transporter ShiA                                                  | 0         | AAur_4132 |
| ARUE_c42760 | putative gluconate transporter                                                    | 0         | AAur_4146 |
| ARUE_c42880 | putative ABC transporter, ATP-binding protein                                     | 1.00E-122 | AAur_4158 |
| ARUE_c42990 | GabP:GABA permease GabP                                                           | 0         | AAur_4169 |
| ARUE_c43050 | ATPase component of putative antimicrobial peptides ABC transporter;<br>BcrA-like | 7.00E-176 | AAur_4175 |



|                |                                                   |           |               |
|----------------|---------------------------------------------------|-----------|---------------|
| ARUE_c43070    | YbjJ2:inner membrane protein YbjJ                 | 0         | AAur_4177     |
| ARUE_c43090    | ABC transporter F family member                   | 0         | AAur_4180     |
| ARUE_c43150    | putative ABC transporter, permease protein        | 0         | AAur_4186     |
| ARUE_c43160    | ATPase component of putative ABC transporter      | 6.00E-124 | AAur_4188     |
| ARUE_c43240    | MviN:integral membrane protein MviN               | 0         | AAur_4196     |
| ARUE_c43360    | OxaA:membrane protein OxaA                        | 0         | AAur_4207     |
| ARUE_113p00100 | putative MFS-family transporter                   | 1.00E-19  | AAur_1381     |
| ARUE_232p00330 | Major facilitator superfamily MFS_1               | 0         | AAur_pTC20052 |
| ARUE_232p00430 | czcD: Cobalt-zinc-cadmium resistance protein CzcD | 5.00E-153 | AAur_pTC20044 |
| ARUE_232p00610 | Putative arsenite efflux pump                     | 2.00E-158 | AAur_pTC20051 |
| ARUE_232p00710 | ctpG: Probable cation-transporting ATPase G       | 0         | AAur_pTC20031 |
| ARUE_232p00780 | copB: Probable copper-exporting P-type ATPase B   | 0         | AAur_pTC20028 |

**Table S2.2:** Putative transporters and binding proteins of *Arthrobacter* sp. Rue61a unrelated to those of *A. aurescens* TC1.

| <b>Locus_tag</b> | <b>Annotation</b>                                                                                  |
|------------------|----------------------------------------------------------------------------------------------------|
| ARUE_c00800      | transmembrane transport protein                                                                    |
| ARUE_c01680      | PTS-dependent dihydroxyacetone kinase, dihydroxyacetone-binding subunit DhaK                       |
| ARUE_c01690      | PTS-dependent dihydroxyacetone kinase, ADP-binding subunit DhaL                                    |
| ARUE_c01700      | dihydroxyacetone kinase, phosphotransfer subunit/phosphocarrier protein HPr                        |
| ARUE_c02370      | putative ABC transporter substrate-binding protein YesO                                            |
| ARUE_c03570      | ABC-type Fe <sup>3+</sup> -hydroxamate transporter, extracellular iron-siderophore binding protein |
| ARUE_c03580      | siderophore interacting protein                                                                    |
| ARUE_c04060      | major facilitator superfamily MFS_1                                                                |
| ARUE_c04580      | putative metabolite transport protein YaaU                                                         |
| ARUE_c08460      | phosphate transport system protein PhoU                                                            |
| ARUE_c15890      | inner membrane transport protein YdhP                                                              |
| ARUE_c16740      | ATP-binding/permease protein CydD                                                                  |
| ARUE_c17270      | putative nicotinamide mononucleotide transporter PnuC                                              |
| ARUE_c17690      | putative sugar ABC transporter, permease protein                                                   |
| ARUE_c17700      | putative sugar ABC transporter, permease protein                                                   |
| ARUE_c17920      | MFS-type transporter                                                                               |
| ARUE_c18180      | ribose import ATP-binding protein RbsA                                                             |
| ARUE_c18190      | ribose transport system permease protein RbsC                                                      |
| ARUE_c18200      | D-ribose-binding protein RbsB                                                                      |
| ARUE_c18250      | amino acid permease-associated region                                                              |
| ARUE_c18330      | EmrB/QacA subfamily drug resistance transporter                                                    |
| ARUE_c18480      | putative sugar ABC transporter, permease protein                                                   |
| ARUE_c18490      | putative sugar ABC transporter, permease protein                                                   |
| ARUE_c18500      | putative secreted sugar-binding protein                                                            |
| ARUE_c18510      | ABC transporter                                                                                    |
| ARUE_c18530      | sugar transporter                                                                                  |
| ARUE_c18570      | putative glucitol transport protein GutA                                                           |
| ARUE_c18650      | putative tartrate transporter TtuB                                                                 |
| ARUE_c18680      | major facilitator superfamily MFS_1                                                                |
| ARUE_c19080      | proline/betaine transporter ProP                                                                   |
| ARUE_c19180      | TRAP C4-dicarboxylate transport system permease DctM subunit                                       |
| ARUE_c19250      | putative ABC transporter permease protein YesQ                                                     |
| ARUE_c19260      | sn-glycerol-3-phosphate transport system permease protein UgpA                                     |
| ARUE_c19290      | putative ABC transporter substrate-binding protein                                                 |
| ARUE_c19300      | sn-glycerol-3-phosphate import ATP-binding protein UgpC                                            |
| ARUE_c19680      | putative MFS transporter                                                                           |
| ARUE_c19730      | alpha-ketoglutarate permease KgtP                                                                  |
| ARUE_c19810      | uncharacterized transporter YycB                                                                   |
| ARUE_c19850      | binding-protein-dependent transport systems inner membrane component                               |
| ARUE_c19860      | putative ABC transporter permease protein                                                          |
| ARUE_c19870      | extracellular solute-binding protein, family 1                                                     |
| ARUE_c21050      | shikimate transporter ShiA                                                                         |
| ARUE_c21140      | glutamine transport ATP-binding protein GlnQ                                                       |
| ARUE_c21150      | inner membrane amino-acid ABC transporter permease protein YecS                                    |
| ARUE_c21160      | ABC-type amino acid transport/signal transduction system                                           |
| ARUE_c24490      | protein-export membrane protein SecF                                                               |

|                |                                                                               |
|----------------|-------------------------------------------------------------------------------|
| ARUE_c24510    | preprotein translocase, YajC subunit                                          |
| ARUE_c26600    | putative permease protein of ABC-type transport system                        |
| ARUE_c27400    | putative permease                                                             |
| ARUE_c31260    | MFS-type transporter                                                          |
| ARUE_c31300    | putative manganese transport protein MntH                                     |
| ARUE_c37340    | ABC-type sugar transport system extracellular component                       |
| ARUE_c37350    | ABC transporter permease protein                                              |
| ARUE_c37360    | L-arabinose transport system permease protein AraQ                            |
| ARUE_c37450    | putative ABC transporter permease protein YurN                                |
| ARUE_c37460    | L-arabinose transport system permease protein AraQ                            |
| ARUE_c38030    | ABC transporter ATP-binding protein                                           |
| ARUE_c39800    | ABC transporter, substrate binding component                                  |
| ARUE_c39810    | proline/glycine/betaine transporter, permease component                       |
| ARUE_c39820    | ABC transporter, permease component                                           |
| ARUE_c39830    | glycine betaine/carnitine/choline transport ATP-binding protein, OpuCA-like   |
| ARUE_c41290    | putative permease                                                             |
| ARUE_c41710    | benzoate transport protein                                                    |
| ARUE_c43040    | putative permease component of ABC-type transport system                      |
| ARUE_232p00230 | major facilitator superfamily MFS_1                                           |
| ARUE_232p00560 | putative heavy metal-translocating P-type ATPase                              |
| ARUE_232p00580 | putative divalent metal ion transporter                                       |
| ARUE_232p00620 | CBS-pair_CorC_Hly-domain- (transporter associated domain-) containing protein |
| ARUE_232p00630 | CBS-pair_CorC_Hly-domain- (transporter associated domain-) containing protein |
| ARUE_232p01200 | putative ABC transporter permease protein                                     |
| ARUE_232p01210 | putative ATP-binding protein                                                  |
| ARUE_232p01220 | putative binding protein                                                      |
| ARUE_232p01490 | amino-acid ABC transporter ATP-binding protein YecC                           |
| ARUE_232p01500 | amino-acid ABC transporter permease protein YckA1                             |
| ARUE_232p01510 | amino-acid ABC transporter permease protein YckA2                             |
| ARUE_232p01520 | amino acid ABC transporter, extracellular amino acid-binding protein          |
| ARUE_232p01550 | inner membrane metabolite transport protein YhjE                              |
| ARUE_232p01590 | putative peptide transport system permease protein                            |
| ARUE_232p01600 | oligopeptide transport system permease protein AppC                           |
| ARUE_232p01610 | uncharacterized ABC transporter ATP-binding protein                           |
| ARUE_232p01670 | putative metabolite transport protein YceI                                    |
| ARUE_232p01720 | putative potassium-transporting ATPase, A subunit                             |
