# Supplementary material for: Complete genome sequence and metabolic potential of the quinaldine-degrading bacterium Arthrobacter sp. Rue61a
Source: PubMed Central journal article supplement (PMC3534580; doi:10.1186/1471-2164-13-534), 2012-10-06
Supplement: 1471-2164-13-534-S3.pdf [file 1471-2164-13-534-S3.pdf]

### Additional File 3:

### Genes of *Arthrobacter* sp. Rue61a, grouped according to functions, as discussed in the text

**Table S3.1:** Genes of *Arthrobacter* sp. Rue61a presumed to be involved in osmoprotection.

| Locus_tag   | Gene symbol   | Predicted protein product                                                          | EC #                 |
|-------------|---------------|------------------------------------------------------------------------------------|----------------------|
| ARUE_c02780 | <i>proP1</i>  | proline/betaine transporter, MF superfamily                                        |                      |
| ARUE_c04460 |               | betaine/carnitine/choline transporter, BCCT family                                 |                      |
| ARUE_c04830 |               | choline oxidase                                                                    | 1.1.3.17             |
| ARUE_c04840 | <i>gbsA</i>   | betaine aldehyde dehydrogenase                                                     | 1.2.1.8              |
| ARUE_c05460 | <i>proP2</i>  | proline/betaine transporter, MF superfamily                                        |                      |
| ARUE_c06090 | <i>yehY</i>   | ABC-type putative osmoprotectant uptake system, permease protein                   |                      |
| ARUE_c06100 | <i>opuCA1</i> | ABC-type glycine betaine/carnitine/choline transport system, ATP-binding protein   |                      |
| ARUE_c06110 | <i>opuBB</i>  | ABC-type glycine betaine/carnitine/choline transport system, permease protein      |                      |
| ARUE_c06120 | <i>osmF</i>   | osmoprotectant uptake system, substrate-binding protein                            |                      |
| ARUE_c08620 | <i>treS1</i>  | trehalose synthase                                                                 | 5.4.99.16            |
| ARUE_c08830 | <i>otsB</i>   | trehalose-6-phosphate phosphatase                                                  | 3.1.3.12             |
| ARUE_c08840 | <i>otsA</i>   | trehalose-6-phosphate synthase                                                     | 2.4.1.15             |
| ARUE_c16900 | <i>trkA1</i>  | Trk system potassium uptake protein, dinucleotide-binding regulatory component     |                      |
| ARUE_c16910 | <i>trkA2</i>  | Trk system potassium uptake protein, dinucleotide-binding regulatory component     |                      |
| ARUE_c17450 | <i>gltB</i>   | glutamate synthase [NADPH/NADH], alpha subunit                                     | 1.4.1.13 or 1.4.1.14 |
| ARUE_c17460 | <i>gltD</i>   | glutamate synthase [NADPH/NADH], beta subunit                                      | 1.4.1.13 or 1.4.1.14 |
| ARUE_c19080 | <i>proP3</i>  | proline/betaine transporter, MF superfamily                                        |                      |
| ARUE_c25180 | <i>proA</i>   | gamma-glutamyl phosphate reductase                                                 | 1.2.1.41             |
| ARUE_c25190 | <i>proB</i>   | glutamate 5-kinase                                                                 | 2.7.2.11             |
| ARUE_c25470 | <i>mscS</i>   | putative mechanosensitive ion channel protein                                      |                      |
| ARUE_c29680 | <i>proX</i>   | glycine betaine/choline-binding protein of an ABC-type transport system            |                      |
| ARUE_c29690 | <i>proZ</i>   | ABC-type proline/glycine betaine transport system, permease component              |                      |
| ARUE_c29700 | <i>proW</i>   | ABC-type proline/glycine betaine transport system, permease component              |                      |
| ARUE_c29710 | <i>opuCA2</i> | glycine betaine/carnitine/choline transport system, OpuCA-like ATP-binding protein |                      |
| ARUE_c30460 | <i>treZ</i>   | malto-oligosyltrehalose trehalohydrolase                                           | 3.2.1.141            |
| ARUE_c30470 | <i>treY</i>   | maltooligosyl trehalose synthase                                                   | 5.4.99.15            |
| ARUE_c34610 | <i>gdh</i>    | homooligomeric NADP <sup>+</sup> -specific glutamate dehydrogenase                 |                      |
| ARUE_c34640 | <i>trkH</i>   | TrkH-like potassium uptake protein, ion-conducting transmembrane component         |                      |
| ARUE_c34650 | <i>trkA3</i>  | Trk system potassium uptake protein, dinucleotide-binding regulatory component     |                      |
| ARUE_c34660 | <i>proC</i>   | pyrroline-5-carboxylate reductase                                                  | 1.5.1.2              |
| ARUE_c39590 | <i>proP4</i>  | proline/betaine transporter, MF superfamily                                        |                      |
| ARUE_c39800 |               | ABC-type transporter, substrate binding component                                  |                      |

|                |               |                                                                               |           |
|----------------|---------------|-------------------------------------------------------------------------------|-----------|
| ARUE_c39810    |               | ABC-type proline/betaine transporter, permease component                      |           |
| ARUE_c39820    |               | ABC-type transporter, permease component                                      |           |
| ARUE_c39830    | <i>opuCA3</i> | glycine betaine/carnitine/choline transporter, OpuCA-like ATP-binding protein |           |
| ARUE_c40470    | <i>proP5</i>  | proline/betaine transporter, MF superfamily                                   |           |
| ARUE_c41530    | <i>mscL</i>   | large conductance mechanosensitive ion channel protein                        |           |
| ARUE_c42120    | <i>treS2</i>  | trehalose synthase                                                            | 5.4.99.16 |
| ARUE_232p00510 | <i>trkH</i>   | TrkH-type potassium uptake protein                                            |           |

**Table S3.2:** Genes of *Arthrobacter* sp. Rue61a possibly involved in formation of reactive oxygen species and in protection against oxidative stress.

| Locus_tag         | Gene symbol    | Predicted protein product                                       | EC #                  |
|-------------------|----------------|-----------------------------------------------------------------|-----------------------|
| ARUE_c00400       | <i>puo</i>     | putrescine oxidase                                              | 1.4.3.10              |
| ARUE_c00520       |                | putative sugar alcohol dehydrogenase or oxidase/alditol oxidase |                       |
| ARUE_c01660       |                | FAD/FMN-containing dehydrogenase or oxidase                     |                       |
| ARUE_c04530       |                | N,N-dimethylglycine oxidase                                     | 1.5.3.10              |
| ARUE_c04810       |                | acyl-coenzyme A oxidase                                         | 1.3.3.6               |
| ARUE_c04830       |                | choline oxidase                                                 | 1.1.3.17              |
| ARUE_c04860       |                | putative molybdopterin oxidoreductase, sulfite oxidase family   |                       |
| ARUE_c05480       |                | Cu <sup>2+</sup> -containing amine oxidase                      |                       |
| ARUE_c06000       | <i>ydbD</i>    | putative Mn catalase                                            | 1.11.1.6              |
| ARUE_c06400       | <i>gpx</i>     | glutathione peroxidase                                          | 1.11.1.9              |
| ARUE_c07090       |                | acyl-coenzyme A dehydrogenase/oxidase family protein            |                       |
| ARUE_c09150       |                | acyl-coenzyme A dehydrogenase/oxidase family protein            |                       |
| ARUE_c09600       |                | putative multicopper oxidase family protein                     |                       |
| ARUE_c11380       | <i>soxA1</i>   | putative monomeric sarcosine oxidase                            | 1.5.3.1               |
| ARUE_c11870       |                | OsmC family stress protein or peroxiredoxin                     |                       |
| ARUE_c14160       |                | acyl-coenzyme A dehydrogenase/oxidase family protein            |                       |
| ARUE_c14890       |                | putative molybdopterin oxidoreductase, sulfite oxidase family   |                       |
| ARUE_c16720–16730 |                | putative cytochrome d ubiquinol oxidase                         | 1.10.2.-              |
| ARUE_c17720       |                | pyranose 2-oxidase                                              | 1.1.3.10              |
| ARUE_c17930       |                | pyranose 2-oxidase                                              | 1.1.3.10              |
| ARUE_c19520       |                | pyridoxine 5'-phosphate oxidase-like protein                    |                       |
| ARUE_c19630       |                | putative multicopper oxidase family protein                     |                       |
| ARUE_c19980       | <i>katE</i>    | catalase                                                        | 1.11.1.6              |
| ARUE_c21130       | <i>soxA2</i>   | putative monomeric sarcosine oxidase oxidase                    |                       |
| ARUE_c21770       |                | putative uncharacterized peroxidase                             |                       |
| ARUE_c22440       | <i>sodaA</i>   | superoxide dismutase                                            | 1.15.1.1              |
| ARUE_c22940       |                | acyl-coenzyme A dehydrogenase/oxidase family protein            |                       |
| ARUE_c23620       | <i>ctaE</i>    | putative cytochrome oxidase subunit III                         | 1.9.3.1               |
| ARUE_c25860       |                | putative peroxiredoxin, AhpE-like                               | 1.11.1.15             |
| ARUE_c26720       |                | putative peroxiredoxin (PRX), BCP subfamily                     | 1.11.1.15             |
| ARUE_c26880       | <i>nadB</i>    | L-aspartate oxidase                                             | 1.4.3.16              |
| ARUE_c29070       | <i>hemG</i>    | protoporphyrinogen oxidase                                      | 1.3.3.4               |
| ARUE_c29170       | <i>thiO</i>    | putative glycine oxidase/D-amino acid oxidase                   |                       |
| ARUE_c32080       | <i>katA</i>    | catalase                                                        | 1.11.1.6              |
| ARUE_c35300–35310 |                | putative xanthine dehydrogenase/xanthine oxidase                | 1.17.1.4/<br>1.17.3.2 |
| ARUE_c35390       | <i>uox</i>     | urate oxidase                                                   | 1.7.3.3               |
| ARUE_c36380       |                | putative peroxiredoxin (PRX), BCP subfamily                     | 1.11.1.15             |
| ARUE_c36580       |                | pyridoxine 5'-phosphate oxidase family protein                  |                       |
| ARUE_c36630       |                | FAD/FMN-containing dehydrogenase or oxidase                     |                       |
| ARUE_c36760       | <i>soxR</i>    | redox-sensitive transcription factor SoxR                       |                       |
| ARUE_c37540       |                | alkylhydroperoxidase like protein, AhpD family                  |                       |
| ARUE_c37570       |                | Cu <sup>2+</sup> -containing primary amine oxidase              | 1.4.3.4               |
| ARUE_c39110       |                | putative sulfite oxidase                                        | 1.8.3.1               |
| ARUE_c39620–39650 | <i>soxBDAG</i> | sarcosine oxidase                                               | 1.5.3.1               |
| ARUE_c41520       | <i>xyoA</i>    | putative xylitol oxidase                                        | 1.1.3.41              |
| ARUE_232p00320    |                | putative multicopper oxidase family protein                     |                       |
| ARUE_232p00590    |                | multicopper oxidase                                             |                       |

|                      |                  |                                                           |          |
|----------------------|------------------|-----------------------------------------------------------|----------|
| ARUE_232p01420       | <i>thiO/thiG</i> | bifunctional protein ThiO/ThiG (ThiG, amino acid oxidase) |          |
| ARUE_113p00040-00060 | <i>meqABC</i>    | quinaldine 4-oxidase                                      |          |
| ARUE_113p00140       |                  | putative Fe/Mn superoxide dismutase                       | 1.15.1.1 |

**Table S3.3:** Genes of *Arthrobacter* sp. Rue61a presumed to be involved in acquisition of iron.

| Locus_tag   | Gene symbol | Predicted protein product                                                                          | EC #     |
|-------------|-------------|----------------------------------------------------------------------------------------------------|----------|
| ARUE_c02640 | <i>rhbB</i> | L-2,4-diaminobutyrate decarboxylase                                                                | 4.1.1.86 |
| ARUE_c02650 |             | putative lysine/ornithine N-monooxygenase                                                          |          |
| ARUE_c02660 |             | putative acetyltransferase                                                                         |          |
| ARUE_c02670 | <i>rhbF</i> | rhizobactin siderophore biosynthesis protein                                                       |          |
| ARUE_c03570 |             | ABC-type Fe <sup>3+</sup> -hydroxamate transporter, extracellular iron-siderophore binding protein |          |
| ARUE_c03580 |             | siderophore interacting protein with a ferredoxin reductase-like (FNR-like) domain structure       |          |
| ARUE_c03590 |             | Fe <sup>3+</sup> -siderophore ABC transporter, transmembrane subunit                               |          |
| ARUE_c03600 |             | Fe <sup>3+</sup> -siderophore ABC transporter, transmembrane subunit                               |          |
| ARUE_c03610 |             | Fe <sup>3+</sup> -siderophore ABC transporter, ATP-binding protein                                 |          |
| ARUE_c05260 |             | Fe <sup>3+</sup> -siderophore ABC transporter, ATP-binding protein                                 |          |
| ARUE_c05270 |             | Fe <sup>3+</sup> -siderophore ABC transporter, transmembrane subunit                               |          |
| ARUE_c05280 |             | Fe <sup>3+</sup> -siderophore ABC transporter, transmembrane subunit                               |          |
| ARUE_c05290 |             | Fe <sup>3+</sup> -siderophore binding protein, FhuD family                                         |          |
| ARUE_c07040 |             | putative Fe <sup>3+</sup> transport system, SfuC-like ATP binding protein                          | 3.6.3.30 |
| ARUE_c07050 |             | putative Fe <sup>3+</sup> -transport system, SfuB-like permease protein                            | 3.6.3.30 |
| ARUE_c07060 |             | putative Fe <sup>3+</sup> -binding extracellular protein, SfuA-/FbpA-like                          | 3.6.3.30 |
| ARUE_c09470 |             | siderophore interacting protein with a ferredoxin reductase-like (FNR-like) domain structure       |          |
| ARUE_c21680 |             | Fe <sup>3+</sup> -siderophore ABC transporter, ATP-binding protein                                 |          |
| ARUE_c21690 |             | Fe <sup>3+</sup> -siderophore binding protein, FhuD family                                         |          |
| ARUE_c21700 |             | Fe <sup>3+</sup> -hydroxamate ABC transporter, permease subunit                                    |          |
| ARUE_c27860 | <i>fur1</i> | ferric uptake regulation protein Fur                                                               |          |
| ARUE_c32070 | <i>fur2</i> | ferric uptake regulation protein Fur                                                               |          |
| ARUE_c38950 |             | siderophore interacting protein with a ferredoxin reductase-like (FNR-like) domain structure       |          |
| ARUE_c38960 |             | Fe <sup>3+</sup> -siderophore ABC transporter, ATP-binding protein                                 |          |
| ARUE_c38970 |             | Fe <sup>3+</sup> -siderophore ABC transporter, permease subunit                                    |          |
| ARUE_c38980 |             | Fe <sup>3+</sup> -siderophore ABC transporter, permease subunit                                    |          |
| ARUE_c38990 |             | Fe <sup>3+</sup> -siderophore binding protein, FepB family                                         |          |
| ARUE_c39970 |             | Fe <sup>3+</sup> -siderophore ABC transporter, ATP-binding protein, CeuD family                    |          |
| ARUE_c39980 |             | Fe <sup>3+</sup> -siderophore ABC transporter, permease subunit, CeuC family                       |          |
| ARUE_c39990 |             | Fe <sup>3+</sup> -siderophore ABC transporter, permease subunit, CeuB family                       |          |
| ARUE_c40000 |             | siderophore binding protein (FatB), CeuA family                                                    |          |

**Table S3.4:** Genes of *Arthrobacter* sp. Rue61a presumed to be involved in response to heavy metal ions.

| Locus_tag      | Gene symbol  | Predicted protein product                                                                       | EC #     |
|----------------|--------------|-------------------------------------------------------------------------------------------------|----------|
| ARUE_c00900    |              | putative NAD(P)H:flavin oxidoreductase/NAD(P)H nitroreductase                                   |          |
| ARUE_c03850    | <i>czcD</i>  | putative cation (cobalt-zinc-cadmium) efflux transporter                                        |          |
| ARUE_c19540    |              | putative heavy-metal-translocating P-type ATPase                                                |          |
| ARUE_c26820    |              | putative anion permease, ArsB/NhaD superfamily                                                  |          |
| ARUE_c33070    |              | putative NAD(P)H:flavin oxidoreductase/NAD(P)H nitroreductase                                   |          |
| ARUE_c37620    | <i>arsC1</i> | putative arsenate reductase ArsC                                                                | 1.20.4.1 |
| ARUE_c37630    | <i>arsC2</i> | putative arsenate reductase ArsC                                                                | 1.20.4.1 |
| ARUE_c37660    | <i>arsC3</i> | putative arsenate reductase ArsC                                                                | 1.20.4.1 |
| ARUE_c41610    |              | possible chromate reductase; YieF/ChrR-like NAD(P)H-dependent FMN reductase                     |          |
| ARUE_c42390    |              | heavy-metal-associated domain (HMA) -containing protein; possible copper chaperone              |          |
| ARUE_c42400    | <i>copA</i>  | putative heavy metal-translocating (Cu <sup>+</sup> /Ag <sup>+</sup> ) P-type ATPase, CopA-like |          |
| ARUE_232p00330 |              | putative major facilitator superfamily transporter; NreB-like                                   |          |
| ARUE_232p00400 | <i>copC</i>  | putative copper resistance protein CopC                                                         |          |
| ARUE_232p00430 | <i>czcD</i>  | cation (cobalt-zinc-cadmium) efflux transporter CzcD                                            |          |
| ARUE_232p00560 |              | putative Cd <sup>2+</sup> /Zn <sup>2+</sup> /Pb <sup>2+</sup> -translocating P-type ATPase      |          |
| ARUE_232p00610 |              | putative ACR3-type arsenite efflux pump                                                         |          |
| ARUE_232p00710 |              | putative Cd <sup>2+</sup> /Zn <sup>2+</sup> /Pb <sup>2+</sup> -translocating P-type ATPase      |          |
| ARUE_232p00780 |              | putative copper-translocating P-type ATPase                                                     |          |
| ARUE_232p00800 | <i>merA</i>  | putative mercuric reductase MerA                                                                | 1.16.1.1 |

**Table S3.5:** Genes of *Arthrobacter* sp. Rue61a possibly involved in resistance to bacitracin.

| <b>Locus_tag</b> | <b>Predicted protein product</b>                                                                                 |
|------------------|------------------------------------------------------------------------------------------------------------------|
| ARUE_c22050      | putative permease component of ABC transport system                                                              |
| ARUE_c22060      | ATPase component of putative ABC-type peptide antibiotic transport system; BcrA subfamily                        |
| ARUE_c26540      | putative sensor histidine kinase                                                                                 |
| ARUE_c26550      | putative response regulator responding to cell wall stress/antimicrobial peptides                                |
| ARUE_c26560      | ATPase component of ABC-type antimicrobial peptide transport system; BceA-like                                   |
| ARUE_c26570      | permease protein of ABC transporter                                                                              |
| ARUE_c34930      | ATPase component of ABC-type antimicrobial peptide transport system; BceA-like                                   |
| ARUE_c34940      | putative permease protein of ABC-type transport system                                                           |
| ARUE_c43020      | putative response regulator containing a CheY-like signal receiver domain and LuxR-C-like HTH DNA-binding domain |
| ARUE_c43030      | putative sensor histidine kinase                                                                                 |
| ARUE_c43040      | putative permease component of ABC-type transport system                                                         |
| ARUE_c43050      | ATPase component of putative antimicrobial peptides ABC transporter; BcrA-like                                   |
| ARUE_c43130      | putative response regulator containing a CheY-like signal receiver domain and LuxR-C-like HTH DNA-binding domain |
| ARUE_c43140      | putative signal transduction histidine kinase                                                                    |
| ARUE_c43150      | putative ABC transporter, permease protein                                                                       |
| ARUE_c43160      | ATPase component of putative ABC transporter                                                                     |

**Table S3.6:** Genes of *Arthrobacter* sp. Rue61a involved in the metabolism of aromatic and N-heterocyclic compounds (see also Additional File 4 for Figures of pathways).

| Locus_tag      | Gene symbol   | Predicted protein product                                                                | EC #                 |
|----------------|---------------|------------------------------------------------------------------------------------------|----------------------|
| ARUE_c02440    | <i>styA2B</i> | putative styrene monooxygenase, StyA2B-like                                              |                      |
| ARUE_c02450    | <i>styA1</i>  | putative oxygenase component, StyA1-like                                                 |                      |
| ARUE_c05840    | <i>hpaC</i>   | flavin reductase; putative reductase component of 4-hydroxyphenylacetate 3-monooxygenase |                      |
| ARUE_c05860    | <i>hpaB</i>   | putative 4-hydroxyphenylacetate 3-monooxygenase oxygenase component (HpaB)               | 1.14.14.-            |
| ARUE_c24100    | <i>vanB</i>   | VanB-like reductase component (flavin-iron/sulfur protein) of oxygenase system           |                      |
| ARUE_c24110    | <i>vanA</i>   | vanillate O-demethylase oxygenase component VanA                                         | 1.14.13.82           |
| ARUE_c33590    | <i>paaG</i>   | putative ring 1,2-epoxyphenylacetyl-CoA isomerase, oxepin-CoA-forming                    |                      |
| ARUE_c33600    | <i>paaE</i>   | ring 1,2-phenylacetyl-CoA epoxidase component                                            |                      |
| ARUE_c33610    | <i>paaD</i>   | ring 1,2-phenylacetyl-CoA epoxidase component                                            |                      |
| ARUE_c33620    | <i>paaC</i>   | ring 1,2-phenylacetyl-CoA epoxidase component                                            |                      |
| ARUE_c33630    | <i>paaB</i>   | ring 1,2-phenylacetyl-CoA epoxidase component                                            |                      |
| ARUE_c33640    | <i>paaA</i>   | ring 1,2-phenylacetyl-CoA epoxidase component                                            |                      |
| ARUE_c33800    | <i>paaI</i>   | phenylacetic acid degradation protein, thioesterase PaaI                                 |                      |
| ARUE_c33810    | <i>paaK</i>   | phenylacetate-coenzyme A ligase                                                          |                      |
| ARUE_c40570    | <i>hpcH</i>   | 4-hydroxy-2-oxo-heptane-1,7-dioate aldolase HpcH                                         | 4.1.2.-              |
| ARUE_c40580    | <i>hpcG</i>   | 2-oxo-hepta-3-ene-1,7-dioic acid hydratase HpcG                                          | 4.2.1.-              |
| ARUE_c40590    | <i>hpcB</i>   | 3,4-dihydroxyphenylacetate 2,3-dioxygenase HpcB                                          | 1.13.11.2            |
| ARUE_c40600    | <i>hpcC</i>   | 5-carboxymethyl-2-hydroxy-muconate semialdehyde dehydrogenase HpcC                       | 1.2.1.60             |
| ARUE_c40620    | <i>hpaG</i>   | 4-hydroxyphenylacetate degradation bifunctional isomerase/decarboxylase HpaG             | 4.1.1.67,<br>5.3.3.- |
| ARUE_c41200    | <i>pobA</i>   | 4-hydroxybenzoate hydroxylase PobA                                                       | 1.14.13.2            |
| ARUE_c41720    |               | putative 2-aminobenzoyl-CoA monooxygenase/reductase                                      | 1.14.13.40           |
| ARUE_c41730    |               | anthranilate-CoA ligase                                                                  | 6.2.1.32             |
| ARUE_c41790    | <i>pcaR</i>   | Pca regulon regulatory protein PcaR                                                      |                      |
| ARUE_c41800    | <i>pcaJ</i>   | 3-oxoadipate CoA-transferase subunit B                                                   | 2.8.3.6              |
| ARUE_c41810    | <i>pcaI</i>   | 3-oxoadipate CoA-transferase subunit A                                                   | 2.8.3.6              |
| ARUE_c41820    | <i>pcaF</i>   | beta-ketoadipyl-CoA thiolase PcaF                                                        | 2.3.1.174            |
| ARUE_c41830    | <i>pcaC</i>   | 4-carboxymuconolactone decarboxylase PcaC                                                | 4.1.1.44             |
| ARUE_c41840    | <i>pcaD</i>   | 3-oxoadipate enol lactone hydrolase PcaD                                                 | 3.1.1.24             |
| ARUE_c41850    | <i>pcaB</i>   | 3-carboxy-cis,cis-muconate cycloisomerase PcaB                                           | 5.5.1.2              |
| ARUE_c41860    | <i>pcaG</i>   | protocatechuate 3,4-dioxygenase alpha chain                                              | 1.13.11.3            |
| ARUE_c41870    | <i>pcaH</i>   | protocatechuate 3,4-dioxygenase beta chain                                               | 1.13.11.3            |
| ARUE_c41880    | <i>hpd</i>    | 4-hydroxyphenylpyruvate dioxygenase Hpd                                                  | 1.13.11.27           |
| ARUE_113p00030 |               | putative XdhC protein                                                                    |                      |
| ARUE_113p00040 | <i>meqA</i>   | quinaldine 4-oxidase, small subunit                                                      | 1.3.99.-             |
| ARUE_113p00050 | <i>meqB</i>   | quinaldine 4-oxidase, medium subunit                                                     | 1.3.99.-             |
| ARUE_113p00060 | <i>meqC</i>   | quinaldine 4-oxidase, large subunit                                                      | 1.3.99.-             |
| ARUE_113p00070 | <i>meqD</i>   | 1H-4-oxoquinaldine 3-monooxygenase                                                       | 1.14.13.-            |
| ARUE_113p00080 | <i>meqE</i>   | 1H-3-hydroxy-4-oxoquinaldine 2,4-dioxygenase                                             | 1.13.11.48           |
| ARUE_113p00090 | <i>meqF</i>   | N-acetylanthranilate amidase                                                             | 3.5.1.13             |
| ARUE_113p00160 | <i>meqR1</i>  | transcriptional regulator                                                                |                      |
| ARUE_113p00210 |               | putative acyl-CoA thioesterase                                                           | 3.1.2.-              |
| ARUE_113p00220 |               | anthranilate CoA ligase                                                                  | 6.2.1.32             |
| ARUE_113p00230 |               | putative 2-aminobenzoyl-CoA monooxygenase/reductase                                      | 1.14.13.40           |
| ARUE_113p00240 | <i>meqR2</i>  | transcriptional regulator                                                                |                      |
